1           **Unraveling the genetic architecture of grain size in einkorn wheat through**  
2           **linkage and homology mapping, and transcriptomic profiling**

3   Kang Yu<sup>1,2,4,5,¶</sup>, Dongcheng Liu<sup>1,¶</sup>, Yong Chen<sup>6,¶</sup>, Dongzhi Wang<sup>1,3</sup>, Wenlong Yang<sup>1</sup>, Wei Yang<sup>4</sup>, Lixin  
4   Yin<sup>4</sup>, Chi Zhang<sup>4,5</sup>, Shancen Zhao<sup>4,5</sup>, Jiazhu Sun<sup>1</sup>, Chunming Liu<sup>2,\*</sup>, Aimin Zhang<sup>1,\*</sup>

5   1. State Key Laboratory of Plant Cell and Chromosome Engineering, Institute of Genetics and  
6   Developmental Biology, Chinese Academy of Sciences, Beijing 100101, China.

7   2. Key Laboratory of Plant Molecular Physiology, Institute of Botany, Chinese Academy of Sciences,  
8   Beijing 100093, China.

9   3. University of Chinese Academy of Sciences, Beijing 100049, China.

10   4. Beijing Genomics Institute-Shenzhen, Shenzhen 518083, China

11   5. State Key Laboratory of Agricultural Genomics, BGI-Shenzhen, Shenzhen 518083

12   6. Science and Technology Department, State Tobacco Monopoly Administration, Beijing100045,  
13   China

14   **Address:**

15   1. No. 1 West Beichen Road, Chaoyang District, Beijing 100101, P.R. China.

16   2. Nanxincun 20, Fragrant Hill, Beijing 100093, P.R. China.

17   3. No.19(A) Yuquan Road, Shijingshan District, Beijing 100049, P.R.China.

18   4&5. BGI Park, No.21 Hongan 3rd Street, Yantian District, Shenzhen 518083, P.R. China.

19   6. No. 55 Yuetan South Street, Xicheng District, Beijing 100045, China.

20   **Email:**

21   Kang Yu, yuying2008l@163.com; Dongcheng Liu, dcliu@genetics.ac.cn; Yong Chen,  
22   chenyong@tobacco.gov.cn; Dongzhi Wang, wangdongzhi1990@163.com; Wenlong Yang,  
23   wlyang@genetics.ac.cn; Wei Yang, yangwei1@genomics.cn; Lixin Yin, yinlixin@genomics.cn; Chi  
24   Zhang, zhangchi2@bgi.com; Shancen Zhao, zhaoshancen@bgi.com; Jiazhu Sun, jzsun@genetics.ac.cn;  
25   Chunming Liu, cmliu@ibcas.ac.cn; Aimin Zhang, amzhang@genetics.ac.cn.

26 \* Correspondence author:

27 Aimin Zhang, amzhang@genetics.ac.cn and Chunming Liu, cmliu@ibcas.ac.cn.

28 Tel: +86-010-64806618

29 Fax: +86-010-64806618

30 ¶ These authors contributed equally to this work.

### 31 **Highlight**

32 Genome-wide linkage and homology mapping revealed 17 genomic regions through a  
33 high-density einkorn wheat genetic map constructed using RAD-seq, and transcription  
34 levels of 20 candidate genes were explored using RNA-seq.

### 35 **Abstract**

36 Understanding the genetic architecture of grain size is a prerequisite to manipulate the  
37 grain development and improve the yield potential in crops. In this study, we  
38 conducted a whole genome-wide QTL mapping of grain size related traits in einkorn  
39 wheat by constructing a high-density genetic map, and explored the candidate genes  
40 underlying QTL through homologous analysis and RNA sequencing. The  
41 high-density genetic map spanned 1873 cM and contained 9937 SNP markers  
42 assigned to 1551 bins in seven chromosomes. Strong collinearity and high genome  
43 coverage of this map were revealed with the physical maps of wheat and barley. Six  
44 grain size related traits were surveyed in five agro-climatic environments with 80% or  
45 more broad-sense heritability. In total, 42 QTL were identified and assigned to 17  
46 genomic regions on six chromosomes and accounted for 52.3-66.7% of the  
47 phenotypic variations. Thirty homologous genes involved in grain development were  
48 located in 12 regions. RNA sequencing provided 4959 genes differentially expressed  
49 between the two parents. Twenty differentially expressed genes involved in grain size  
50 development and starch biosynthesis were mapped to nine regions that contained 26  
51 QTL, indicating that the starch biosynthesis pathway played a vital role on grain  
52 development in einkorn wheat. This study provides new insights into the genetic  
53 architecture of grain size in einkorn wheat, the underlying genes enables the

54 understanding of grain development and wheat genetic improvement, and the map  
55 facilitates the mapping of quantitative traits, map-based cloning, genome assembling  
56 and comparative genomics in wheat taxa.

## 57 **Keywords**

58 High-density genetic map; Einkorn wheat (*Triticum monococcum*); Grain size; QTL;  
59 RAD-seq; RNA-seq

## 60 **Abbreviations**

61 ANOVA, analysis of variance; CIM, composite interval mapping; cM, centiMorgan;  
62 GA, grain area; Gb, giga base pairs; GC, grain circumference; GL, grain length; GLW,  
63 grain length / width; GW, grain width; InDel, insertion deletion; LOD, Logarithm of  
64 the odds; Mb, mega base pairs; QTL, quantitative trait locus or loci; RAD-seq,  
65 restriction site-associated DNA sequencing; RIL, recombinant inbred line; RNA-seq,  
66 RNA sequencing; SNP, single-nucleotide polymorphism; TGW, thousand-grain  
67 weight.

## 68 **Introduction**

69 Grain weight is one of the most important traits in wheat (*Triticum aestivum* L.),  
70 which were mainly and tightly underpinned by grain morphology including two main  
71 components, grain length and width. In domestication process and breeding history,  
72 grain size was a major selection and breeding target, and has been widely selected and  
73 manipulated to increase the related grain yield in wheat (Gegas *et al.*, 2010). In China,  
74 an increase in wheat yield potential from  $\sim 1 \text{ T ha}^{-1}$  in 1965 to  $\sim 5.4 \text{ T ha}^{-1}$  today is  
75 mainly due to the great genetic increase in thousand-grain weight (NBS, 2015).  
76 Meanwhile, the grain morphology directly influences the milling performance and  
77 seedling vigor, which in turn determines the end products (Campbell *et al.*, 1999;  
78 Gegas *et al.*, 2010). Moreover, wheat preserves huge variations of grain size and  
79 weight among domesticated and wild species in diploid, tetraploid and hexaploid

80 levels (Gegas *et al.*, 2010; Jing *et al.*, 2007). Thus, understanding the genetic  
81 structures of grain size would provide prerequisite information for wheat  
82 improvements.

83 High-density genetic maps played a fundamental role in dissecting genetic  
84 components of agronomic traits and assembling genomes. As a basic tool in genetic  
85 and genomic researches, high-density genetic maps have been widely developed in  
86 crops, including cereal crops, e.g., wheat (Iehisa *et al.*, 2014; Kumar *et al.*, 2016), rice  
87 (Xie *et al.*, 2010), maize (Chen *et al.*, 2014), and barley (Chutimanitsakun *et al.*,  
88 2011), and economic crops, e.g., eggplant (Barchi *et al.*, 2012), grape (Wang *et al.*,  
89 2012a), and sesame (Zhang *et al.*, 2013). A high-density consensus map of tetraploid  
90 wheat was developed by integrating datasets of 13 bi-parental populations, which  
91 harbored 30144 markers and covered 2631 cM of A and B sub-genomes (Maccaferri  
92 *et al.*, 2015). In hexaploid wheat, a high-density genetic map was constructed recently  
93 including 119566 single nucleotide polymorphism (SNP) markers, greatly facilitating  
94 the fine-mapping of a major QTL for grain number (Cui *et al.*, 2017). In barley, a  
95 high-density amplified fragment-length polymorphism map of 3H involving 84  
96 markers covered 6.7 cM and was applied to narrow the genomic region for the  
97 important domestication loci, *Brittle rachis* (*Btr1* and *Btr2*), which have been further  
98 molecular cloned and characterized (Komatsuda *et al.*, 2004; Pourkheirandish *et al.*,  
99 2015). Recently, with the demand of genome sequencing, the high-density genetic  
100 maps have been widely exploited at genome assembling, especially for the  
101 construction of chromosomal pseudomolecules by anchoring and ordering scaffolds,  
102 i.e. wheat (Chapman *et al.*, 2015; Jia *et al.*, 2013), cotton (Zhang *et al.*, 2015), and  
103 peanut (Bertioli *et al.*, 2016).

104 For the species with less available genomic information, it is urgently necessary  
105 to develop a high-density genetic map with a large number of genetic markers  
106 distributed over the whole genome. The advances in high-throughput sequencing  
107 technologies provide an excellent platform for genome-wide discovery of sequence

108 variations and development of polymorphic genetic markers. Of these,  
109 genotyping-by-sequencing (GBS) methods utilize restriction enzyme digestion to  
110 reduce the complexity of a genome and sequence large amount of the resulted  
111 fragments with next-generation sequencing platforms, e.g., HiSeq 2000. This process  
112 would provide huge SNPs for the development of high-density genetic linkage map.  
113 Moreover, the methods, such as restriction site-associated DNA sequencing (RAD-seq)  
114 (Baird *et al.*, 2008), allow to label fragments with barcode sequences and pool several  
115 dozens of samples to one library, which extremely reduce per sample cost in a  
116 reasonable time. Thus, these next-generation sequencing based methods have been  
117 widely explored for the development of high-density linkage map in plants (Chen *et al.*  
118 *et al.*, 2014; Chutimanitsakun *et al.*, 2011; Jia *et al.*, 2013; Pfender *et al.*, 2011;  
119 Saintenac *et al.*, 2013; Xie *et al.*, 2010; Zhang *et al.*, 2013).

120 Grain size or weight is genetically controlled by multiple genes, and large number  
121 of quantitative trait loci (QTL) for grain traits in wheat have been characterized in the  
122 past two decades (Brinton *et al.*, 2017; Gegas *et al.*, 2010; Kumar *et al.*, 2016;  
123 Maphosa *et al.*, 2014; Prashant *et al.*, 2012; Rasheed *et al.*, 2014; Tsilo *et al.*, 2010;  
124 Williams and Sorrells, 2014). The identified QTL distributed along all the wheat  
125 chromosomes, especially the stable and major QTL on A sub-genome 1A (Gegas *et al.*,  
126 2010; Williams and Sorrells, 2014), 2A (Tsilo *et al.*, 2010), 3A (Gegas *et al.*, 2010;  
127 Kumar *et al.*, 2016), 4A (Prashant *et al.*, 2012), 5A (Brinton *et al.*, 2017; Gegas *et al.*,  
128 2010; Williams and Sorrells, 2014), 6A (Gegas *et al.*, 2010; Maphosa *et al.*, 2014),  
129 and 7A (Kumar *et al.*, 2016; Tsilo *et al.*, 2010). Of those characterized QTL, one QTL  
130 for grain weight on chromosome 5A was further validated with two near-isogenic  
131 lines (NILs) and fine-mapped to a genetic interval of 4.32 cM corresponding to 74.6  
132 Mb genomic sequences in Chinese Spring RefSeq v1.0 genome (Brinton *et al.*, 2017).  
133 However, it is a big challenge to underpin the causative genes in such a long genomic  
134 interval, due to functional redundancy (genetic buffering) of genes in three  
135 homoeologous genomes (A, B and D) and high repetitive nature of the wheat genome  
136 (International Wheat Genome Sequencing Consortium, 2014; Slade *et al.*, 2005). Up

137 to now, most candidate genes for grain size and weight in wheat were characterized  
138 through homology-based cloning (Kumar *et al.*, 2016; Maphosa *et al.*, 2014). Several  
139 genes in rice have been proved to influence wheat grain size and weight, e.g. *GW2*  
140 (*TaGW2*), *GS3* (*TaGS-D1*), *CKX2* (*TaCKX6*), *GS5* (*TaGS5*), *TGW6* (*TaTGW6*),  
141 *GASR7* (*TaGASR7*) and *GIF1* (*TaCWI*) (Li and Yang, 2017). Apart from this, the  
142 starch and sucrose biosynthesis pathway unraveled in model species was proved to  
143 function in common wheat, e.g. *TaAGPL*, *TaAGPS* and *TaSus2* (Hou *et al.*, 2017;  
144 Jiang *et al.*, 2011). Thus, the reverse genetics is an efficient approach in wheat to  
145 characterize the underlying genetic components of morphogenesis (Li and Yang,  
146 2017). Nevertheless, along with the rapid progress of genome sequencing, forward  
147 genetics would greatly facilitate the characterization of candidate genes involved in  
148 the development of grain size and weight of wheat.

149 Einkorn wheat, *Triticum monococcum* ssp. *monococcum* L. ( $A^m A^m$ ,  $2n = 2x = 14$ ),  
150 the only cultivated diploid wheat, was domesticated from its wild species *T.*  
151 *monococcum* ssp. *boeoticum* ( $A^b A^b$ ). As one of left untouched crops, the wild einkorn  
152 wheat grew in natural environment without human intensive selection for thousands  
153 of years (Jing *et al.*, 2007). It preserves a large number of phenotypic variations,  
154 which would facilitate the dissection of genetic architectures for agronomic important  
155 traits (International Wheat Genome Sequencing Consortium, 2014; Jing *et al.*, 2007;  
156 Zaharieva and Monneveux, 2014). The leaf rust resistant gene *Lr10*, the most  
157 important domestication gene *Q* and vernalization genes *Vrn1* and *Vrn2* were  
158 map-based cloned with the help of einkorn wheat (Feuillet *et al.*, 2003; Simons *et al.*,  
159 2006; Stein *et al.*, 2000; Yan *et al.*, 2003; Yan *et al.*, 2004). Thus, the genome  
160 characteristics, highly polymorphism, and diversified traits make einkorn wheat a  
161 good model plant for gene discovery and breeding improvement in hexaploid wheat  
162 (*T. aestivum*,  $2n = 6x = 42$ , AABBDD) (Shindo *et al.*, 2002; Stein *et al.*, 2000; Yan *et*  
163 *al.*, 2003).

164 To unravel the genetic architecture of grain traits in einkorn wheat, a recombinant

165 inbred line (RIL) population of wild and cultivated einkorn wheat was explored to  
166 map QTL and characterize the underlying candidate genes. We exploited population  
167 SNPs through RAD-seq approach, developed a high-density genetic map, conducted a  
168 genome-wide QTL analysis for grain traits, and elucidated the candidate genes or  
169 gene pathways underlying the QTL based on comparative genomics and RNA  
170 sequencing (RNA-seq) analysis. The data revealed complex genetic components  
171 determining the grain size variation and the positive alleles retained across  
172 domestication in einkorn wheat. The whole-genome transcriptomic profiling further  
173 elucidated the candidate genes underlying QTL with significantly differential  
174 expressions between cultivated and wild einkorn wheat, and the superior alleles  
175 identified in this work provided opportunities for wheat genetic improvement.

## 176 **Materials and Methods**

### 177 **Plant material and phenotyping**

178 The 109 RIL population ( $F_{10}$ ) of *T. monococcum* ssp. *boeoticum* (KT1-1) × *T.*  
179 *monococcum* ssp. *monococcum* (KT3-5) were selected for linkage map construction  
180 and QTL mapping. This population and its parents were kindly provided by the  
181 KOMUGI Wheat Genetic Resources Databases of Japan.

### 182 **Field experiment and phenotyping**

183 The RILs and their parents were grown with two replicates in a completely  
184 randomized block design at the experimental station of the Institute of Genetics and  
185 Developmental Biology, Chinese Academy of Sciences, Beijing (40°5'56"N and  
186 116°25'8"E) in four successive years (2011, 2012, 2013, and 2014), and at the  
187 experimental station of Henan Agricultural University, Zhengzhou (34°51'52"N,  
188 113°35'45"E) in one year (2014). These environments are designated E1, E2, E3, E4,  
189 and E5, respectively.

190 All RILs and their parents were planted in single 2-m rows with 40 cm between  
191 rows and 20 cm between individuals. The seeds were harvested from five randomly

192 selected guarded plants from each line and replicate and then threshed by manual.  
193 Grain weight was determined using 100 grains with three replicates and transformed  
194 to thousand-grain weight (TGW, g). 100 grains for each RIL from each replicate were  
195 imaged and processed using a SC-G software (WSeen, Hangzhou, China), and the  
196 averages of the grain length (GL, mm), width (GW, mm), length / width (GLW), area  
197 (GA, mm<sup>2</sup>), and circumference (GC, mm) were calculated accordingly.

### 198 **RAD library construction and sequencing**

199 Complexity-reduced genomic libraries prepared using the restriction endonuclease  
200 *SbfI* (CCTGCAGG) has been reported in other species with large genomes  
201 (Chutimanitsakun *et al.*, 2011; Pfender *et al.*, 2011). The genomic DNA of RILs were  
202 sufficiently digested with *SbfI* and processed into RAD libraries according to the  
203 protocol of Baird *et al.* (2008). We used a set of 16 barcoded adapters with sticky ends  
204 complimentary to 3' overhang (TGCA-3') created by *SbfI*. The RAD libraries with an  
205 average size of 500 bp was constructed. For each library, 16 RILs were pooled  
206 together with each 6-bp barcode sequence to distinguish them and loaded to one lane,  
207 except for the seventh lane which contained 13 RILs and two parental lines. The RAD  
208 libraries were sequenced for single read (101 bp) on an Illumina Genome Analyzer  
209 IIx.

### 210 **RAD-seq data processing and SNP calling**

211 RAD-seq data were processed by commands from Stacks v0.98 (Catchen *et al.*, 2011).  
212 Firstly, raw data were split into individuals according to first 6-bp barcode sequences  
213 of reads and filtered using sliding window methods by *process\_radtags* with  
214 parameters of “-e sbfI -c -q -r -i fastq -E phred33” implemented in Stacks. If any  
215 read contained uncalled base or low phred33 quality scores less than 10 in any sliding  
216 window of  $0.15 \times$  read length were removed and discarded. Then, SNP calling from  
217 these tag sequences with *SbfI* site were carried out by *ustacks*, *cstacks*, and *sstacks*  
218 from the RIL population, Finally, the SNPs were transformed to genotypes, filtered  
219 with calling ratio > 40%, and applied for constructing linkage map.



## 220 **Genetic map construction**

221 All the collected genotypes for the RILs were subjected to linkage mapping, and the  
222 distorted markers (Chi-square test  $P < 0.01$ , deviating from the expected 1:1  
223 Mendelian segregation ratio) were excluded if these markers greatly affect the order  
224 of their neighbor markers or excessively change linkage distance. The linkage  
225 grouping and marker ordering were conducted using Joinmap V4.0 (Van Ooijen and  
226 Voorrips, 2004) based on LOD ranging from 3.0 to 15.0 and MSTmap (Wu *et al.*,  
227 2008), respectively. Recombination frequencies were converted into centiMorgan  
228 using Kosambi function (Kosambi, 1943). The final graphical linkage maps were  
229 generated using MapChart2.0 (Voorrips, 2002).

## 230 **Syntenic analysis**

231 BLASTN was used to align the SNP markers against the physical maps of hexaploid  
232 wheat (IWGSC WGA v0.4; accessed from <https://urgi.versailles.inra.fr/>) and barley  
233 (IBSC RefSeqv1.0 pre-publication,  
234 [http://webblast.ipk-gatersleben.de/barley\\_ibsc/downloads](http://webblast.ipk-gatersleben.de/barley_ibsc/downloads)). We filtered BLASTN  
235 output data based on e-value  $< 1e^{-10}$  and query coverage  $\geq 90\%$ , respectively. Those  
236 hits that cannot meet the conditions were discarded. To balance the relationship bias  
237 of alignment in different genomes, different percentage identity thresholds were used,  
238 91% for H genome of barley, 98%, 96%, and 96% for A, B, and D genome of wheat,  
239 respectively. The cleaned data of alignments were used to compare the genetic map  
240 with physical maps using OmicCircos (Hu *et al.*, 2014) implemented in R (R Core  
241 Team, 2016).

## 242 **Statistical analysis and QTL mapping**

243 The broad-sense heritability ( $H^2$ ) of six quantitative traits was estimated with analysis  
244 of variance (ANOVA) and Pearson's correlation coefficients among traits were  
245 calculated in R (R Core Team, 2016). The coefficient of variation (CV) values  
246 independently calculated for six traits from each individual environment as below:  $\sigma/\mu$ ,  
247  $\sigma$  and  $\mu$  represent the standard deviation and the mean of the phenotypic data in the

248 population. QTL analysis were performed using composite interval mapping (CIM)  
249 method in Windows QTL Cartographer V2.5 (Wang *et al.*, 2012b) as previous  
250 procedure (Yu *et al.*, 2017). QTL were reported according to the previous method  
251 (Kumar *et al.*, 2016). Only the QTL detected above LOD threshold were included. If  
252 any significant QTL was identified with LOD below the threshold, but  $> 2$  in other  
253 environments, the QTL were also included in the results as supporting information.  
254 Those QTL identified in at least two environments or associated with at least two  
255 traits were reported. QTL linked with flanking markers or overlapped confidence  
256 intervals (CIs,  $\pm 1$  LOD) were considered as one QTL for each trait with the CI  
257 reassigned by the overlapped genetic positions, while the unique genomic regions  
258 were considered as regions with at least one QTL included. The total explained  
259 variance by QTL were estimated using both ANOVA and multiple regression  
260 according to previous study (Yu *et al.*, 2017).

## 261 **RNA-seq and data analysis**

### 262 ***RNA extraction and sequencing***

263 At one-leaf stage seedlings from KT1-1 and KT3-5 were grown at 4~6 °C treatment  
264 with six weeks. After that, the seedlings were transplanted to 25 cm<sup>2</sup> × 25 cm pot in  
265 greenhouse under growing conditions of 16 h light and 25 °C and 8 h darkness and  
266 15 °C. Spikes were harvested at 0, 7, 14, and 21 day(s) after flowering (DAF). From  
267 each developmental stage, more than three spikes from each line were pooled for  
268 RNA isolation. Each sample has three biological repeats. The construction of the  
269 libraries and RNA-seq were performed by the BGI (Shenzhen, China). The cDNA  
270 libraries with average insert size 300 bp from 24 samples were prepared with TruSeq  
271 RNA Sample Preparation Kit v2 (Illumina San Diego, USA) and sequenced on  
272 HiSeq4000 (Illumina, San Diego, USA) according to manufacturer's standard  
273 protocols.

### 274 ***Differential gene expression analysis***

275 The raw RNA-seq reads were filtered for contamination of the adaptor reads and

276 low-quality reads or unknown nucleotides. The resultant clean reads were aligned  
277 against wheat accession Chinese Spring (CS) TGACv1 genome assembly  
278 ([http://plants.ensembl.org/Triticum\\_aestivum](http://plants.ensembl.org/Triticum_aestivum)). Transcript count information for  
279 sequences to each gene was calculated and normalized to the fragments per kilobase  
280 of transcript per million mapped reads (FPKM) values (Trapnell *et al.*, 2010).  
281 Significant differentially expressed (DE) genes were screened using bioconductor  
282 package NOISeq (Tarazona *et al.*, 2011). The genes with  
283  $|\log_2(\text{FPKM}_{\text{KT3-5}}/\text{FPKM}_{\text{KT1-1}})| > 1$ , and probability  $> 0.8$  were identified as DE genes,  
284 while genes with the probability  $> 0.7$  were considered as suggestive DE genes. Gene  
285 functions were assigned according to the best match of the alignments using BLASTP  
286 (v2.2.23) with default parameters to the Kyoto Encyclopedia of Genes and Genomes  
287 (KEGG) (<http://www.genome.jp/kegg/>), NR (<ftp://ftp.ncbi.nlm.nih.gov/blast/db>) and  
288 Gene Ontology (GO) databases. GO terms of the investigated genes were obtained by  
289 using Blast2GO (Conesa *et al.*, 2005), and KEGG pathways in which the genes might  
290 be involved were extracted from the matched genes in KEGG database. GO and  
291 KEGG pathway functional enrichment analysis were performed using phyper function  
292 implemented in R (R Core Team, 2016). GO terms with corrected-*P* values  $\leq 0.05$  and  
293 KEGG pathways with *Q* values  $\leq 0.05$  were defined as significant enrichments.

## 294 **Results**

### 295 **Multigenic control of grain size related traits in einkorn wheat.**

296 To investigate the agronomical performance of grain size related traits, the 109 RILs  
297 derived from an inter sub-specific cross, *T. boeoticum* KT1-1  $\times$  *T. monococcum*  
298 KT3-5 (Shindo *et al.*, 2002; Yu *et al.*, 2017), were grown in five environments  
299 (designed from E1 to E5, respectively) under different agro-climatic conditions. The  
300 phenotypic data were collected, including grain length (GL), width (GW), length /  
301 width ratio (GLW), area (GA), circumference (GC), and thousand-grain weight (TGW)  
302 (**Table S1; Fig. 1; Fig. S1**). The wild einkorn wheat KT1-1 generally has small seed  
303 size, GL = 6.94 mm and GW = 1.79 mm in average, and the cultivated einkorn KT3-5  
304 has big seed size, GL = 7.94 mm and GW = 2.64, with a 47% increase in GW than

305 that of KT1-1. Among the RIL population, GL and GW distributed continuously and  
306 preserved a transgressive inheritance, for example, GL varied from 6.17 mm to 8.85  
307 mm with a mean of 7.71 mm in E2. High broad-sense heritability ( $H^2$ ) was observed  
308 in both traits (0.86 for GL and 0.82 for GW) though phenotypic difference occurred  
309 among different environments. However, significant higher coefficient of variation  
310 (CV) were documented in GW across four environments (10.37% of GW versus 7.36%  
311 of GL,  $P = 0.0094$  based on *t-test*), demonstrating that GW harbored larger variations  
312 in this einkorn wheat population. Moreover, TGW showed the highest CV from 21.16%  
313 (E1) to 32.64% (E3) across all environments, but with high heritability (0.85),  
314 revealing a relative larger effect of genotype-by-environment interactions. Meanwhile,  
315 the heritability of other traits were not lower than 0.80, though the phenotypic  
316 performance varied widely in different environments (**Table S1**). Thus, the large  
317 variations of the observed traits were proposed mainly under genetic control with  
318 multiple loci in this RIL population.

319 The significant correlations were observed among GL, GW, GLW, GA, GC and  
320 TGW (**Table S2**). GL had the highest positive correlation with GC ( $r = 0.99$ ,  
321 Bonferroni-adjusted  $P < 0.01$ ), followed by TGW versus GA (0.95,  $P < 0.01$ ), GC  
322 versus GA (0.91,  $P < 0.01$ ), and GW versus GA (0.89,  $P < 0.01$ ) (**Fig. 1**). TGW  
323 positively correlated with all the grain size related traits, except GLW (-0.33,  $P <$   
324 0.01), of which a stronger correlation with GW was detected (from 0.73 to 0.93 with  
325 an average of 0.88,  $P < 0.01$ ) than GL (from 0.66 to 0.82 with an average of 0.78,  $P <$   
326 0.01) across all the surveyed environments (**Fig. 1; Table S2**). Moreover, GW and GL  
327 had unbalanced correlations with the composite traits, GLW, GA and GC (**Fig. 1**). The  
328 GLW negatively correlated significantly with GW (-0.67,  $P < 0.01$ ), but did not  
329 correlated with GL (0.24,  $P = 0.19$ ). GC highly correlated with GL (0.99 (GL) *versus*  
330 0.63 (GW),  $P < 0.01$ ), while GA had an almost equal significant positive correlation  
331 with GL and GW. Thus, GW was a more important determinant of TGW in this RIL  
332 population, and GL and GW differentially contributed to these composite traits, GLW  
333 (grain shape), and GA and GC (grain size). This analysis revealed the complexity of

334 genetic architectures and genetic connections of grain size related traits.

335 The principal component analysis (PCA) was performed to identify the major  
336 sources of variations in the morphometric datasets on the environment-wide dataset  
337 (**Fig. S2; Table S3**). Two extracted PCs, PC1 and PC2, significantly captured 97.0%  
338 to 98.6% of the total variations in the RIL population in each environment (**Table**  
339 **S3Error! Reference source not found.**). These two PCs showed similar  
340 organizations in four environments, of which PC1 (65.5% to 77.8%) and PC2 (20.8%  
341 to 31.5%) captured primary variation in grain size and grain shape, respectively (**Fig.**  
342 **S2**). In addition, both PCs with 72.7% (PC1) and 25.7% (PC2) of the explained  
343 variation were simultaneously identified on an environment-wide dataset (the average  
344 values and BLUP for each trait) (**Table S3**). Therefore, PC2 captures primarily grain  
345 shape differences including GLW, GW and GL, and PC1 describes grain size  
346 variations, where a proportional increase in GL and GW positively associates with an  
347 increase of GA and subsequently grain weight (**Fig. S2c**).

#### 348 **Development of a high-density genetic map through RAD-sequencing (RAD-seq)** 349 **approach**

350 To construct a high-density genetic linkage map, RAD-seq platform was explored to  
351 characterize SNPs between two parents, and their RIL population. A *SbfI*  
352 reduced-representation library was constructed, and a total of 64.88 Gb sequences in  
353 seven lanes on Illumina Genome AnalyzerIIx were subsequently generated. These  
354 single-end reads (642 M) with 101 bp were demultiplexed to two parental lines and  
355 their 109 RILs according to the corresponding barcodes (**Table S4**). The reads with  
356 low base quality, or with ambiguous barcodes or *SbfI* cut-sites identified by  
357 *process\_radtags* embedded in Stacks (Catchen *et al.*, 2011), were discarded. Finally,  
358 438 M clean reads were trimmed to 94 bp per read after removing the first 6-bp  
359 barcode sequence and the last base, and this resulted  $\sim 3.95 \pm 1.06$  M (mean  $\pm$  standard  
360 deviance) reads per sample for further analysis (**Table S4**). The SNP calling using  
361 Stacks (Catchen *et al.*, 2011) with all the 438 M clean reads resulted in 42278 putative

362 SNPs at 25805 genomic tags (11.36% of total 227244 tags). Of these SNPs, 25609  
363 SNPs distributed at 16566 tags were retained with more than 40% calling rate in the  
364 RIL population, and these tags were hereinafter referred to as SNP markers for SNPs  
365 in one tag formed one haplotype.

366 These 16566 SNP markers were subjected to construct the genetic map, along  
367 with the available 939 markers (including DArT, SSR, Gene, and RFLP etc.) (Yu *et*  
368 *al.*, 2017). The resulted genetic map contained 10876 molecular markers distributed  
369 on seven chromosomes designated as Tm1A to Tm7A based on the known mapped  
370 markers, and these markers were grouped into 1551 unique bins (**Table 1; Fig. 2**). The  
371 genetic map spanned a total length of 1873.04 cM with an average marker interval of  
372 0.17 cM and average marker density of 5.8 per cM (**Table 1**). The number of markers  
373 on each chromosome varied from 1,343 (Tm1A) and 1,732 (Tm2A) and genetic bins  
374 from 176 (Tm4A) to 265 (Tm7A) per chromosome. The shortest chromosome was  
375 Tm6A, and it harbored 1357 SNP and 115 other type markers with a genetic length of  
376 238.6 cM, an average marker interval of 0.16 cM and marker density of 6.17 markers  
377 per cM. The longest chromosome was Tm3A, which contained 1656 markers with a  
378 genetic length of 293.5 cM, an average marker interval of 0.18 cM. On this map, the  
379 average bin length of each chromosome varied from 1.07 cM of Tm7A to 1.50 cM of  
380 Tm4A. Moreover, the map represented an average physical length of 454.21 kb (4.94  
381 Gb/10876) when considering the genome length of *T. urartu* (Ling *et al.*, 2013).

382 Compared with previous map constructed with the same RIL population (Yu *et al.*,  
383 2017), this high-density SNP genetic map has been extended about 496 cM (from  
384 1377 cM to 1873 cM) through mapping SNP markers in-between other markers or on  
385 the distal ends of linkage groups. The length extension was primarily resulted from  
386 additional intra-chromosomal recombination (~439 cM) detected by the new mapped  
387 SNP markers. Meanwhile, 84 SNP markers located beyond other markers at the distal  
388 ends of chromosomes, of which twenty-one were mapped on Tm1AS/L, six on  
389 Tm2AS, two on Tm4AL, fifty-one on Tm5AS/L, and four on Tm6AS. These

390 extensions covered 29 bins with a length of ~57 cM in the SNP linkage map.  
391 Regarding to the gap in this high-density linkage map, all the intervals had a length of  
392 <10 cM between two neighboring markers, albeit one gap on Tm4A (20.82 cM  
393 between the bin3 to bin4) and two gaps on Tm7A (12.17 cM between bin263 and  
394 bin264, 10.02 cM between bin173 and bin174) (**Fig. 2; Table S5**). We noticed only  
395 one gap greater than 20 cM on Tm4A, while the previous reported two gaps (> 17 cM)  
396 were saturated with SNP markers. The gap on Tm4A should be the properties of this  
397 RIL population (Hori *et al.*, 2007; Shindo *et al.*, 2002; Yu *et al.*, 2017), and even  
398 shared by other einkorn wheat population (Jing *et al.*, 2007; Singh *et al.*, 2007). Thus,  
399 this einkorn wheat genetic linkage map was greatly improved in marker density and  
400 evenness and represented to be a high-quality map with thousands of markers and  
401 limited gaps on each linkage group, which provided an elite tool for unraveling the  
402 genetic components of agronomic important traits and genome assembling of einkorn  
403 wheat.

#### 404 **Homologous regions in barley and wheat**

405 To evaluate the quality and genome coverage of our SNP genetic map, 9937 SNP  
406 markers were aligned via BLASTN against barley (IBSC RefSeqv1.0, referred as  
407 HvRefSeqV1) (Mascher *et al.*, 2017) and hexaploid wheat genomes (accession  
408 “Chinese Spring”, IWGSC WGA v0.4). The parameter of identities, 98% for A  
409 genome, 96% for B and D genomes, and 91% for H genome were used to filter  
410 alignments to decrease the marker number bias because of the relatedness of these  
411 four genomes. This resulted in 1834, 2187, 1693, 922 hits at A, B, D and H genomes,  
412 respectively. The filtered alignments corresponded to 3102 SNP markers, 88.91% of  
413 which were syntenous and mapped to the expected homologous chromosomes.  
414 Through Spearman’s rank correlation coefficient ( $\rho$ ) of the 2758 syntenous marker  
415 locations on einkorn wheat and four genomes, the high level of collinearity (average  $\rho$   
416 = 0.76) between physical maps and genetic distances of einkorn wheat was verified,  
417 except Tm4A vs Ta4A and Tm7A vs Ta7B (**Fig. 3a, b**). This should be attributed to  
418 4AL/5AL/7BS translocations during wheat’s evolutionary history (Devos *et al.*, 1995;



419 King *et al.*, 1994). The translocation between 4A and 5A was observed in einkorn  
420 wheat when compared the genetic map with B, D, and H genomes (**Fig. 3b**; **Fig. S3a**,  
421 **b**). This translocation corresponded to ~50 cM in the genetic map and ~35 Mb, ~28  
422 Mb, ~20 Mb in the chromosomes Ta4B, Ta4D, and Hv4H, respectively (**Fig. 3c**).  
423 However, the 4AL/7BS translocation were not obviously detected using our data for  
424 only two SNPs from the distal end of Tm4A covering ~1 cM were mapped onto  
425 Ta7BS (**Fig. 3c**). Moreover, the gene-rich regions preserved higher collinearity than  
426 centromeric regions, where the shortness of genetic distance was shown because of  
427 less recombination (**Fig. 3a**). It was worth noting that the mapped SNP markers  
428 covered > 97% of all the genomes, except for Ta4A (92%) and Ta3B (93%), revealing  
429 a high genome coverage of this genetic map (**Fig. S3c**). Therefore, the high  
430 collinearity provided the syntenic blocks between einkorn wheat and the available  
431 genomes, which would facilitate the identification of the interesting genomic blocks  
432 for further analysis.

### 433 **Genetic architectures of grain size related traits in einkorn wheat**

434 To elucidate the genetic architecture of grain size related traits in einkorn wheat, a  
435 genome-wide QTL analysis through Windows QTL Cartographer (Wang *et al.*, 2012b)  
436 was performed in this RIL population, along with the phenotypic data and the  
437 high-density SNP linkage map. Using the CIM method, a total of 42 additive QTL  
438 were identified in five environments distributed across six chromosomes, except  
439 Tm4A, and they had a LOD peak score of 3.4 or more and explained 6.4% to 38.1%  
440 of the phenotypic variations (**Fig. S4**; **Table S6**). Among 42 QTL, 31 (74%) loci  
441 involved alleles from KT3-5 for increasing phenotypic values, while the other 11  
442 (26%) loci had alleles from KT1-1 for increasing phenotypic values, suggested that  
443 positive alleles for grain size related traits were present even in the parent with low  
444 phenotypic value. These 42 unique QTL were assigned to 17 genomic regions for  
445 some QTL for several traits co-located at the same region on chromosomes. This  
446 resulted an average number of 2.5 QTL for each region, of which 3A-2 (273.6-282.9  
447 cM) harbored the most of six traits related QTL (**Table 2**; **Fig. 2**).



448 To investigate the candidate genes underlying these QTL, homologous genes with  
449 functions on grain size or weight reported in rice, barley, and wheat, were retrieved  
450 and mapped to our high-density genetic map. Except 1A-1 that is homologous to  
451 chromosomal centromeric region, the remaining sixteen QTL regions in einkorn  
452 wheat had homologous blocks in hexaploid wheat (Chinese Spring) and barley  
453 genomes. These syntenic blocks had average physical lengths of 24.29 Mb and 18.85  
454 Mb in hexaploid wheat A and barley H genomes, respectively (**Fig. S5**). This process  
455 allowed 41 collected genes to be mapped, of which 40 and 36 homologs were  
456 detected in wheat and barley genomes, respectively (**Table S7**). Among all these  
457 genes, 30 genes were mapped in the QTL confidence intervals (CIs), seven genes  
458 (*Flo2*, *GIF1*, *SRS5*, *AGPL-plas*, *Vrn2*, *GS1a*, and *DWARF2*) were closely linked with  
459 their target QTL, but four genes had genetic distance larger than 10 cM from the  
460 identified QTL. These four genes corresponded to five genomic loci, *Sus2* (83.67 cM)  
461 and *GW7* (75.70 cM) on Tm2A, *Sus1* (32.65 cM), *Sus2* (83.67 cM), and *GASR7*  
462 (103.17 cM) on Tm7A (**Fig. 2; Table S7**). To confirm their concordant locations on  
463 the map, *AGPL*, *Sus1*, *Sus2*, *Vrn1*, *Vrn2*, *Vrn3*, *NAL1*, *GS1a*, *GASR7*, and *GW7* genes  
464 were mapped by developing polymorphic markers according to sequence variations  
465 (ie. SNP and InDel) (**Table S8**). One InDel was identified at the promotor region of  
466 *Vrn3*, and the resultant InDel marker was mapped to the homologous region on Tm7A  
467 as expected, closely linked with *PUL*, *HGW*, *TEF1* and *DSG1* genes (**Fig. 2; Fig. S6**).  
468 Collectively, *AGPL*, *Vrn1*, *Vrn3*, and *NAL1* were mapped to QTL regions 1A-3, 5A-2,  
469 7A-1, and 2A-1, respectively, and *Vrn2* and *GS1a* were located to a small genetic  
470 distance of < 5 cM with 5A-2 and 6A-1, consistent with the comparative homologous  
471 regions. Thus, the genetic mapping of these genes further confirmed the  
472 homology-based mapping data and their sequence variations might affect their  
473 functions on grain size development.

#### 474 ***GL & GW QTL***

475 Cultivated einkorn wheat KT3-5 had longer and much wider grain than KT1-1, the

476 other parent of the RIL population (**Table S1**). In total, eleven genomic regions were  
477 mapped QTL for both GL and GW (**Fig. S7**). For GL, six unique QTL were  
478 distributed over chromosomes Tm2A, Tm3A, Tm5A, Tm6A, and Tm7A, explaining  
479 from 7.27% to 35.43% of phenotypic variation across all environments (**Table S6**).  
480 The KT1-1 alleles on Tm2A, Tm3A, Tm5A and Tm6A decreased GL with 0.14-0.45  
481 mm, while the allele on Tm7A increased 0.16-0.34 mm. All the detected QTL  
482 represented by peak markers could explain 59.1% of total phenotypic variation (**Table**  
483 **S9**). Multiple comparison of phenotypic data showed that when RILs inherited with  
484 2-3 positive alleles, it would increase GL significantly with  $P < 0.01$  (**Fig. S8**). Eight  
485 QTL for GW were detected across all six QTL-located chromosomes, jointly  
486 explaining 56.8% of total phenotypic variation of GW (**Table S9**). QTL of GW  
487 showed negative effect of most KT1-1 alleles decreasing grain width with 0.07-0.13  
488 mm, and only *QGw.igdb-7A.1* mapped in 242.2-250.2 cM of 7A-3 showed increasing  
489 grain width of 0.07 mm (**Table 2**). Three QTL regions containing QTL for both GL  
490 and GW, were 3A-2, 5A-2, and 6A-2, and these regions located multiple genes  
491 including *TmLUX1*, *CWI2*, *CCS52B* for 3A-2, *Vrn1*, *PHO1*, *Shattering1*, *GL3* on  
492 5A-2, *BSG1* on 6A-2 (**Fig. 2**). For GL, 2A-1 contained *NALI*, 7A-1 for several genes  
493 including *Vrn3*, *PUL*, *HGW*, *TEF1*, *DSG1*, and 7A-2 for *GW6a*. For GW, 1A-3 had  
494 *AGPL*, *TEF1*, *ETT*, 7A-3 for *SBEI*, and the remaining QTL overlapped with QTL for  
495 other traits. Of these genes, *Vrn1*, *Vrn3*, *AGPL1*, *TmLUX1* and *NALI*, were genetic  
496 mapped as previously reported (Yu *et al.*, 2017). These mapped genes showed large  
497 sequence variations between the two parental lines, indicating that they might be the  
498 candidate genes underlying the QTL and providing potential diagnostic markers for  
499 allelic selection. A 9-bp deletion in *AGPL1* promoter region (~1 kb upstream) was  
500 observed in KT1-1, and a SNP changed amino acid from S in KT3-5 to G in KT1-1,  
501 but other SNPs detected in other five exons were synonymous mutations (**Fig. S9**).  
502 Moreover, the increase of positive alleles of the detected nine QTL for GW showed  
503 more significant divergence between different groups than alleles for GL (**Fig. S8**;  
504 **Table S10**).

## 505 *GLW, GA & GC QTL*

506 The composite traits, GLW, GA, and GC, were calculated according to GL and GW  
507 and also exploited for QTL analysis, as they directly reflected grain size (GC, GA)  
508 and shape (GLW). Out of QTL for GLW, the most significant QTL *QGlw.igdb-6A.1*,  
509 can explain 19.0%-34.0% of the phenotypic variations (**Table 2**). This QTL was  
510 specifically mapped to genomic region 6A-1 that contains homologous genes *SSIIb*,  
511 *PGL2*, and *BUI*, which participated in starch biosynthesis and *brassinosteroid*  
512 *signaling*, and associated with starch accumulation and grain length and weight. The  
513 unique QTL region for GLW was 1A-1, which was generally syntenic with a large  
514 proportion of centromeric region of the physical maps and little information of  
515 homologous genes was available. For GA, *QGa.igdb-1A.1* located on 139.9-145.1 cM  
516 of Tm1A and explained 17.54% of the total phenotypic variation with positive effect  
517 with KT1-1 allele, which contained no QTL for GL and GW (**Table 2**). However, this  
518 QTL overlapped with TGW QTL *QTgw.igdb-1A.1*, and in this region, one gene for  
519 *GID1* that interacted with *RHT1* in plants to control the plant height was located.  
520 Moreover, the *QGa.igdb-3A.1* overlapped with *QTgw.igdb-3A.1* on 3A-1 that linked  
521 with *GIF1* (**Fig. 2**). For GC, four overlapped with GL QTL, consistent with strong  
522 correlation between these two traits ( $r = 0.99$ ,  $P < 0.01$ ). Overall, genetic overlaps  
523 were observed between the three composite traits and GL/GW, which were revealed  
524 by co-location of QTL for GL/GW with QTL for GLW (three of five), GA (six of  
525 eight), and GC (four of five).

## 526 *TGW QTL*

527 To understand the influence of grain size on grain weight, QTL analysis for TGW was  
528 conducted and ten QTL were identified on Tm1A, Tm2A, Tm3A, Tm5A, and Tm7A  
529 (**Table 2**). Two significant QTL, *QTgw.igdb-1A.1* and *QTgw.igdb-7A.1*, showed  
530 positive effects of KT1-1 allele on TGW with increasing thousand-grain weight of  
531 2.18 g and 1.29 g, respectively (**Table 2**). The remaining QTL decreased the TGW of  
532 1.04-3.03 g and explained 6.71% to 38.05% of the total phenotypic variations. Several

533 previous mapped genes had effects on TGW or its related traits, like *Vrn1* (5A-2) and  
534 *Vrn3* (7A-1), which acted on opposite additive effects (**Table 2**). Although one QTL,  
535 *QTgw.igdb-5A.3* were mapped between 251.4-256.4 cM, less information was known  
536 according to homologous analysis, except that *Vrn2* (248.03 cM) closely linked with  
537 this region (**Table 2**). Interestingly, genes in the starch biosynthesis pathway, *AGPL*,  
538 *AGPL-plas*, *SSIIIb*, *PHO1* and *SBEI* being mapped five genomic regions 1A-3, 5A-3,  
539 2A-1, 5A-2 and 7A-3, respectively, had negative effects of wild einkorn wheat KT1-1  
540 allele, except 7A-3 for positive effect (**Fig. 2**). With respect to five grain size related  
541 traits, nine of TGW QTL overlapped, out of which seven of eight GA QTL and six of  
542 eight GW QTL coincided while only a half of GL QTL and two GW-associated GLW  
543 QTL were co-located. Along with correlation analysis and PCA of TGW and other  
544 traits, it further demonstrated that TGW was a complex trait and mainly determined  
545 by grain size. The data also demonstrated that grain size related traits (especially for  
546 GA and GW), associated positively more with the TGW, while grain shape (GLW)  
547 had negative effect on TGW at least for three QTL *QGlw.igdb-1A.2*, *QGlw.igdb-6A.1*,  
548 and *QGlw.igdb-7A.1*.

#### 549 **Candidate genes underlying QTL through transcriptomic analysis**

550 To detect dynamic profiles of genes involved in grain development, RNA sequencing  
551 (RNA-seq) was performed with whole spikes of two parents (KT1-1 and KT3-5) at  
552 four grain filling stages, 0 day after flowering (DAF), 7 DAF, 14 DAF, and 21 DAF.  
553 After filtering low-quality or adapter-contaminated reads, a total of 130.2 Gb clean  
554 data was harvested from 24 libraries of eight samples (two accessions × four  
555 developmental stages) and each with three biological replicates. After mapping  
556 against gene sets of the A genome of hexaploid wheat Chinese Spring (TGACv1.32,  
557 [http://plants.ensembl.org/Triticum\\_aestivum](http://plants.ensembl.org/Triticum_aestivum)), 40.38% reads covering 87.77% (28561  
558 / 32539) of total genes have unique positions, which were subjected to further  
559 analysis.

560 The differential expressed (DE) genes between KT1-1 and KT3-5 were compared

561 across four developmental stages using NOISEq (Tarazona *et al.*, 2011). A total of  
562 4959 DE genes, including 2061 up-regulated and 2898 down-regulated genes, were  
563 identified with threshold of probability  $> 0.8$  and  $|\log_2(\text{fold change, FC})| > 1.0$  (**Fig.**  
564 **S10a**). Through a Gene Ontology (GO) enrichment analysis, these genes were found  
565 involved in carbon fixation (GO:0015977,  $P < 10^{-8}$  at 7 DAF), amino acid metabolism  
566 (GO:0009069, GO:0009071, GO:1901606,  $P < 0.05$ ), and regulations of nucleotide  
567 metabolism-related enzymes (**Fig. S10b; Table S11**). And they were mainly assigned  
568 to macromolecular complex (GO:0032991,  $P < 10^{-4}$ ), organelle part (GO:0044422,  $P$   
569  $< 10^{-3}$ ), specifically thylakoid related (GO:0009536, GO:0009534, GO:0031976 and  
570 GO:0009579,  $P < 10^{-4}$ ) at 0 DAF, 7 DAF and 14 DAF, and cytoplasm (GO:0005737  
571 and GO:0044444,  $P < 10^{-2}$ ) at 21 DAF in cellular components (**Fig. S10b; Table S11**).  
572 Regarding to molecular functions, structural molecule activity (GO:0005198,  $P <$   
573  $10^{-4}$ ), enzyme activity that related with glucosyltransferase activity (GO:0046527,  $P <$   
574  $10^{-3}$ ), hydrolase activity (GO:0016798,  $P < 10^{-4}$ ) and oxidoreductase activity  
575 (GO:0016491,  $P < 10^{-4}$ ) were dominant at 7 DAF, while enzyme, peptidase inhibitor  
576 and regulator activity related genes were prevailing at 21 DAF (**Fig. S10b; Table S11**).  
577 Furthermore, Kyoto Encyclopedia of Genes and Genomes (KEGG) enrichment  
578 analysis also revealed the divergence of the DE genes along with developmental  
579 stages (**Fig. S10c; Table S12**). The DE genes were highly enriched in the pathways  
580 related with energy metabolism (the photosynthesis,  $Q$  value  $< 10^{-5}$ ) and basic  
581 metabolisms at the early stage (0 and 7 DAF), while the genes at metabolisms of  
582 amino acid, fatty acid, hormone, nitrogen, and nutrients were mainly enriched at the  
583 middle stage (14 DAF). However, the protein processing and other possible biotic  
584 resistance-related metabolism (taurine, hypotaurine, and benzoxazinoid) expressed at  
585 the late stage (21 DAF).

586 To elucidate the candidate genes underlying QTL, DE genes on QTL regions  
587 were characterized through comparative transcriptional profiling along grain  
588 developmental process. Out of these mapped homologous genes, *SRS5* (*small and*  
589 *round seed 5*, TRIAE\_CS42\_5AL\_TGACv1\_377517\_AA1247600.1) encodes an

590 alpha-tubulin and regulated cell length and seed length in rice (Segami *et al.*, 2012).  
591 At the developmental stages critical for seed setting rate and the sink (grain) size, this  
592 gene had FPKM values of 547 and 650 at 0 and 7 DAF, respectively, in the high grain  
593 size parent KT3-5, while these were 227 and 257 in the low grain size parent KT1-1,  
594 respectively. This gene had overall up-regulation of 1.67 to 2.53-fold in KT3-5 at all  
595 the investigated stages (**Fig. 4; Table S13**). Regarding to the position on the genetic  
596 linkage map, *SRS5* was mapped onto the QTL region 5A-2 (142.8-164.3 cM), which  
597 contributed to GL, GW, GA and TGW (**Fig. 2**). The locus could explain 8.13% of the  
598 phenotypic variation for GL, and 7.23% for GW, further contributed to 22.29% ( $R^2$ ) of  
599 the phenotypic variation for GA (**Table 2**), implying that this locus affected grain size  
600 as in rice. Taken together, our data indicated that *SRS5* might be the candidate gene  
601 for this grain size QTL, affecting ~6.22% GA and ~8.78% TGW (**Table S6**).

602 *TEF1* is one of transcript elongation factors and affected tillering number in rice but  
603 increased grain size in wheat (Zheng *et al.*, 2014). This gene was mapped onto two  
604 genomic regions 1A-3 (200.8-224.3 cM) and 7A-1 (62.3-70.4 cM). The copy on 1A-3  
605 showed higher expression levels at 0 DAF and 7 DAF in KT3-5 than in KT1-1, while  
606 it had similar levels between them at late developmental stages (14 to 21 DAF) (**Fig.**  
607 **4**). The cultivated allele of QTL on 1A-3 could increase about 5.04% TGW (**Table**  
608 **S6**). Moreover, *TEF1* showed relative high expressions (FPKM > 57) in grain (**Table**  
609 **S13**), which might confer to phenotypic variations of grain (sink) size of developing  
610 seed. However, another copy on 7A-1 expressed increasingly along with grain  
611 development stages and reached to maximum at 21 DAF, which was similar with its  
612 expression profiling in common wheat (Zheng *et al.*, 2014). Nevertheless, no  
613 significant differences of expression patterns between two parents were observed  
614 across grain filling stage, consistent with no QTL for TGW on 7A-1 (**Table 2**).

615 The gene encoding ADP-glucose pyrophosphorylase (*AGPase*) large subunit was  
616 mapped to the genomic region 1A-3 (200.8-224.3 cM) based on homology analysis,  
617 which was a rate-limiting enzyme to catalyze the formation of ADP-glucose (ADPG),

618 the substrate for starch biosynthesis (Georgelis *et al.*, 2007). This gene (*AGPLcyto*,  
619 ID17) was highly expressed with FPKM values of 398 and 246 at the middle and late  
620 stages of grain development, respectively (**Fig. 5; Table S13**), which is crucial for  
621 grain filling (Yang *et al.*, 2004). Furthermore, the gene of AGPase small subunit  
622 (*AGPScyto*, ID18) had similar pattern with high expression levels (FPKM reaching to  
623 1194 at 14 DAF). These two genes were differentially expressed between the two  
624 parental lines at 7 DAF for *AGPLcyto* and 14 DAF for *AGPScyto* (probability > 0.7),  
625 respectively (**Fig. 5; Table S13**). To confirm the gene location and elucidate the  
626 causality of expression variation, *AGPL* in einkorn wheat was sequenced and several  
627 variations were detected along both the promoter and genic regions between two  
628 parental sequences, including InDel and SNP (**Fig. S9**). A polymorphic marker based  
629 on one InDel at intron I was co-localized with genomic region 1A-3 on this genetic  
630 map, further confirming the reliability of its homology-based mapping. Our data  
631 indicated that variations of expression levels for its two subunits determined the  
632 formation of ADPG, and further affected the starch accumulation and even grain  
633 weight.

634 To further investigate the starch biosynthesis pathway involved in the grain  
635 development, forty-eight genes in the pathway were retrieved from CS cDNA  
636 database based on previous information (Krasileva *et al.*, 2017), and the expression  
637 patterns of their homologs in both parental lines were compared. In total, thirty-one  
638 genes (65% of total genes) were significantly differentially expressed at least one  
639 stage between KT1-1 and KT3-5 with probability > 0.7 (**Fig. 5**). Out of these genes,  
640 the restricted enzyme gene, *ADPGT* (*ADPG Transporter*) or *BT1* (*Brittle1*),  
641 transporting the substrate for starch biosynthesis ADPG from cytoplasm to amyloplast  
642 in cell (Sullivan *et al.*, 1991), was highly expressed in KT3-5 (FPKM > 800) with fold  
643 changes of 1.67 and 4.86 (probability > 0.7) for 7 DAF and 14 DAF, respectively.  
644 Another gene, *Starch Phosphorylases 1* (*PHO1*, ID 29), which is responsible for the  
645 conversion of ADPG to the precursor for starch biosynthesis by starch synthase (SS,  
646 EC 2.4.1.1), was expressed in KT3-5 above 4-fold changes than in KT1-1 at 14 DAF.



647 Moreover, *Sucrose synthase* (*Sus*, ID 6) had much higher expression level, especially  
648 at late developmental stages, which could compensate the expressions of another five  
649 low-abundance *Sus* copies (ID 1~5) (**Fig. 5; Table S13**). The *UDP-glucose*  
650 *pyrophosphorylase* (*UGPase*, ID 15), *Starch branching enzyme IIa* (*SBEIIa*, ID 42)  
651 and *SBEIIb* (ID 43) showed similar patterns as well. Though several DE genes were  
652 expressed highly in KT1-1 at 0 DAF or 7 DAF, for example, *Sus* (ID 2 and 3), *Frk* (ID  
653 11), *UGPase* (ID 16), *PHO2* (ID 27), *PHO2* (ID 28), *GBSSI* (ID 30), *SBEI* (ID 39),  
654 *ISAIII* (ID 47) and *PUL* (ID 48), most of these genes were less down-regulated or  
655 even up-regulated in KT3-5 at late developmental stages, which were a very critical  
656 period for starch accumulation (Yang *et al.*, 2004). In developing seeds, these  
657 rate-limiting functional enzymes are very important for starch synthesis, and  
658 differentially expressed of relevant genes would affect the starch accumulation and  
659 further grain development.

660 In summary, through QTL analysis, homologous gene mapping and  
661 transcriptomic analysis, 44 of total 80 genes on QTL regions or in starch biosynthesis  
662 pathway were mapped on nine QTL regions and showed differentially expressed in  
663 two parental lines (**Table S13**). Our data demonstrated that the expression patterns of  
664 several functional genes were consistent with allelic effects of the related QTL, which  
665 implied that they were the candidate genes underlying QTL. The candidate functional  
666 genes associated with grain (sink) size and starch biosynthesis were considered as  
667 important components for grain size and starch accumulation in developing grains, in  
668 turn for grain weight, explained most of the phenotypic variations ranging from 52.3%  
669 for GLW to 66.7% for TGW (**Table S9**). Furthermore, the phenotypic values of the  
670 related traits significantly increased as the numbers of the positive QTL alleles  
671 accumulated (**Fig. S8**), which could be exploited to fine-tuned grain size and weight.  
672 Thus, our data revealed the complex genetic architecture of gain size on a  
673 genome-wide scale, elucidated QTL and their underlying genes through genetic  
674 mapping and transcriptional profiling, which were an essential for identifying the  
675 candidate genes for grain size and weight and could assist marker-based selection in



676 wheat breeding improvement.

## 677 **Discussion**

678 Grain size, as a complexity trait, is still less understood in wheat. In the respect of  
679 diploid nature of genome and richness of natural diversity of grain size, we revealed  
680 genetic architecture of grain size using an einkorn wheat RIL population. In this study,  
681 the RAD-seq, combining NGS and restriction enzyme digestion to reduce the genome  
682 complexity, was explored to provide the genetic polymorphisms at a genome scale for  
683 the development of a high-density genetic map integrated with previously einkorn  
684 wheat map (Yu *et al.*, 2017). This high-density map contains 10876 evenly distributed  
685 genetic markers, had 1551 unique positions, and covered > 97% physical maps of  
686 wheat and barley genomes, demonstrating its good quality for einkorn wheat genetic  
687 and genomic researches. In particular, the comparative genomics through mapping  
688 SNP markers from genetic map could not only aid to examine the syntenic blocks  
689 with genomes of wheat relatives, but also provide the genomic sequence information  
690 for dissecting interesting regions and for revealing structural variations of  
691 chromosomes between different genomes.

692 **The grain size variations in einkorn wheat were elucidated by phenotypic and**  
693 **genome-wide QTL analysis.** In this study, the RAD-seq derived high-density genetic  
694 map was explored to access the genetic architecture of grain size. Phenotypic analysis  
695 demonstrated that grain size traits were under complex genetic control, the strong  
696 correlations were identified between these traits. Two PCs captured grain size and  
697 shape, respectively, explaining > 97% of the phenotypic variations. The genome-wide  
698 QTL analysis were further conducted and identified a total of 17 genomic regions that  
699 contributed to grain size and weight. Five genomic regions on chromosome Tm5A  
700 were associated with most surveyed traits, which coincided with three meta-QTL on  
701 chromosome Ta5A of common wheat in a meta-analysis with six double haploid  
702 populations (Gegas *et al.*, 2010). The mapping interval 1A-2 containing QTL for GA  
703 and TGW was co-localized with the meta-QTL MQTL2, which was linked with

704 *Glu-1A* on Ta1A (Gegas *et al.*, 2010). Moreover, two QTL regions distributed on  
705 Tm7A were associated with all the screened traits, but in common wheat, only QTL  
706 for GL, GLW, GA, TGW were detected from two individual populations and no  
707 meta-QTL was reported (Gegas *et al.*, 2010). In addition, the distribution breadth of  
708 QTL (the number of chromosomes and genomic regions on which QTL were detected)  
709 identified from this individual RIL population of einkorn wheat is wide, for which  
710 two importantly possible reasons were relatively broad polymorphisms between two  
711 surveyed parental lines and high genomic coverage of the genetic map. Thus, it  
712 demonstrated that the present RIL population for einkorn wheat harbored more  
713 genetic diversities than common wheat, although the principal components extracted  
714 from phenotypic dataset were similar between them, but this RIL population have  
715 smaller background-specific effects in determining the genetic architecture not as in  
716 hexaploid wheat population (Gegas *et al.*, 2010).

717 **Novel QTL were detected in einkorn wheat through comparing with**  
718 **tetraploid and hexaploid wheat populations.** QTL for grain size have been widely  
719 studied in wheat, and they were detected all chromosomes of tetraploid and hexaploid  
720 wheat (Brinton *et al.*, 2017; Cheng *et al.*, 2017; Gegas *et al.*, 2010; Golan *et al.*, 2015;  
721 Kumar *et al.*, 2016; Maphosa *et al.*, 2014; Peleg *et al.*, 2011; Prashant *et al.*, 2012;  
722 Rasheed *et al.*, 2014; Russo *et al.*, 2014; Tsilo *et al.*, 2010; Williams and Sorrells,  
723 2014; Wu *et al.*, 2015). However, very limited information is available for QTL  
724 analysis of grain size and weight in einkorn wheat. Based on syntenic regions between  
725 einkorn wheat and hexaploid wheat (**Fig. 3**) and marker information on Chinese  
726 Spring RefSeq v1.0 genome  
727 ([https://urgi.versailles.inra.fr/jbrowseiwgsc/gmod\\_jbrowse/](https://urgi.versailles.inra.fr/jbrowseiwgsc/gmod_jbrowse/)), QTL regions overlapped  
728 markers from other studies were considered as common QTL regions, otherwise novel  
729 QTL regions. In our study, five of seventeen QTL regions were newly detected,  
730 including 1A-3, 5A-4, 5A-5, 6A-2, and 7A-3. Three QTL regions, 3A-2, 5A-2 and  
731 7A-1, involving 12 QTL for grain size and weight, should be affected by heading date  
732 under the control of three genes *TmLUX1*, *Vrn1* and *Vrn3*, compared our previous

733 findings (Yu *et al.*, 2017). The other 12 QTL regions overlapped with QTL or markers  
734 from studies in tetraploid and hexaploidy wheat (Brinton *et al.*, 2017; Cheng *et al.*,  
735 2017; Gegas *et al.*, 2010; Golan *et al.*, 2015; Kumar *et al.*, 2016; Peleg *et al.*, 2011;  
736 Russo *et al.*, 2014; Wang *et al.*, 2009; Wu *et al.*, 2015). For example, a TGW QTL  
737 detected in tetraploid wheat population linked with *wPt-7053* (Peleg *et al.*, 2011),  
738 which locates on 676.40 Mb of 7A, and similarly, QTL-27 (Kumar *et al.*, 2016) and  
739 *QGl.cau-7A.3* (Wu *et al.*, 2015) from hexaploid wheat were located 674.27-705.13  
740 Mb and 671.42-679.96 Mb, respectively, corresponding to 7A-2 region  
741 (670.94-693.33 Mb) from this study. However, 7A-2 was detected to be associated  
742 with GL and GLW in this study, while in hexaploid wheat this locus affected  
743 GL/GW/GA/TGW and GL only, respectively (Kumar *et al.*, 2016; Wu *et al.*, 2015).  
744 Our data indicated that einkorn wheat had similar genetic basis but divergent  
745 functions of some locus of regulating grain size with tetraploid and hexaploid wheat.

746 **The candidate genes underlying QTL were predicted based on comparative**  
747 **genomics and transcriptomics.** The underlying candidate genes of genetic loci could  
748 help to understand the morphogenesis, and to provide diverse alleles for breeding  
749 improvement in common wheat. Last two decades has witnessed the characterization  
750 of a number of causative genes for grain size and weight in crops (Li and Yang, 2017).  
751 In this work, by comparative analysis and transcriptomic profiling with RNA-seq,  
752 several genes have been proved to be the candidate genes for grain size in einkorn  
753 wheat. Those mapped homologous genes were differentially expressed at early to  
754 middle stages for expanding grain volume before initiating grain filling in developing  
755 seeds. One copy of a transcript elongation factor (*TEF*) gene on Tm1A was highly  
756 expressed in the KT3-5 with big seeds at 0 DAF and 7 DAF. Overexpression of *TEF*  
757 of hexaploid wheat could enhance the grain length in Arabidopsis, and *TEF1* was  
758 significantly associated with grain length and width, and TGW in wheat through  
759 haplotype analysis (Zheng *et al.*, 2014). Moreover, the homolog of *SRS5* of rice  
760 showed successive higher expression in cultivated einkorn wheat KT3-5 across all  
761 developmental stages. This gene encoding alpha-tubulin protein mainly expressed on

762 young panicle and regulated cell elongation and seed length (Segami *et al.*, 2012).  
763 Mutant *SRS5* (Os11g0247300) with an amino-acid substitution reduced seed length  
764 1.38 mm by decreasing cell and lemma length. The wild type *SRS5* could partially  
765 rescue mutant phenotype in transgenic plants (Segami *et al.*, 2012). Thus, these genes  
766 mapped on QTL regions were differentially expressed at the start of grain  
767 development and should be considered as main determinant factors for grain size.  
768 Furthermore, starch accumulation was deliberated critically to grain filling in wheat  
769 (Yang *et al.*, 2004), whose pathway has been well-exemplified (map00500 in KEGG,  
770 <http://www.kegg.jp>). Five enzymes, Sus, AGPase, AGPGT (BT1), SS and SBE were  
771 characterized to be critical for this process, and their encoding genes play the  
772 important roles in formation of UGPG (the first step in the conversion of sucrose to  
773 starch) and ADPG (the substrate of starch), transferring ADPG into amyloplast from  
774 cytoplasm and yielding the end starch (Sullivan *et al.*, 1991; Yang *et al.*, 2004). In this  
775 work, differential expression of these rate-limiting enzyme encoding genes were  
776 observed at middle to late stages of grain development. The *AGPL* co-localized with  
777 1A-2, involved QTL for TGW, GW and GLW (**Fig. 2**), and the negative allele from  
778 KT1-1 can decrease 1.20 g TGW accounting for 7.8% to 15.4% of parental  
779 phenotypic variations across the surveyed environments (**Table 2; Table S1**). Further  
780 several genomic variations including SNPs and InDels were observed in this gene  
781 involving promoter and genic regions, implying that transcriptional levels  
782 differentiated between two parents might due to these variations (**Fig. S9**). Alleles for  
783 *Sus* and *AGPL* have closely association with grain weight in common wheat, mainly  
784 contributed by variations on transcript levels, which affected about 3-5 g and 2-4 g  
785 TGW, respectively (Hou *et al.*, 2017; Jiang *et al.*, 2011). Overall, transcriptional  
786 profiling analysis of 48 genes in starch biosynthesis pathway were investigated to  
787 elucidate expression patterns in developing seeds of einkorn wheat in this work.  
788 Thirty-one genes were expressed differentially at different grain development stages,  
789 especially the aforementioned rate-limiting enzyme genes (**Fig. 5**). Therefore, our data  
790 indicated that different expression patterns of these pathway genes together might

791 contribute the final grain weight by affecting starch accumulation across grain filling.  
792 Furthermore, we developed molecular markers for these related genes, for example  
793 *AGPL*, *NAL1-2A* (ID 8), *GS1a* (ID 24), *GASR7* (ID 32), and flowering pathways  
794 genes (*Vrn1*, *Vrn2* and *Vrn3*), which will facilitate in marker-assisted wheat breeding  
795 endeavors (**Table S7**).

796 **Genes in flowering pathway affect the grain size and weight.** Several genes in  
797 flowering pathway, such as *Vrn1*, *Vrn2*, *Vrn3*, and *TmLUX1* were mapped onto our  
798 genetic linkage map (**Fig. 2**). These genes have been positional cloned and functioned  
799 in wheat flowering pathway (Gawronski *et al.*, 2014; Yan *et al.*, 2006; Yan *et al.*, 2003;  
800 Yan *et al.*, 2004), and QTL analysis identified them as candidate genes underlying  
801 QTL for heading date (Yu *et al.*, 2017). In this study, they were mapped or linked to  
802 QTL regions involving grain size traits, *Vrn1* on 5A-2, *Vrn2* closely linked to 5A-4,  
803 *Vrn3* on 7A-1, and *TmLUX1* on 3A-2 (**Fig. 2**). As expected, these reproductive  
804 development-related genes have further affected the final performance in grain size  
805 and weight. The cultivated einkorn wheat alleles of QTL at *Vrn1* and *Vrn2* loci have  
806 positive effects on all related traits (mainly grain size related, GL, GW, GA, and  
807 TGW), while the wild type allele on QTL at *Vrn3* locus showed positive effects on  
808 grain shape related traits (GL and GC) and promoted flowering (Yu *et al.*, 2017). This  
809 may imply that the vernalization requirement is an important domestication syndrome  
810 in einkorn wheat, while heading or flowering time were not selected for their  
811 influence on the adaptation to different growth environments in einkorn wheat  
812 (Bullrich *et al.*, 2002; Lewis *et al.*, 2008; Snape *et al.*, 2001).

813 **The untapped alleles for grain weight were identified in wild einkorn wheat.**  
814 In this work, we identified seven QTL within three QTL regions (7A-1, 7A-2, and  
815 7A-3) on chromosome Tm7A, of which the wild einkorn wheat has positive alleles for  
816 all the grain size related traits. They contributed to grain length and width in a relative  
817 large proportion, for example, *QGl.igdb-7A.2* on 7A-2 increasing 0.19 mm grain  
818 length and explaining 15.5% of the phenotypic variation of GL, *QGw.igdb-7A.1*

819 co-locating with both *QGa.igdb-7A.1* and *QTgw.igdb-7A.1* on 7A-3 to increase the  
820 0.55 mm<sup>2</sup> grain area and 1.29 g thousand-grain weight (**Table S6; Table 2**). It  
821 indicates that the remaining superior alleles of genes controlling improvement of  
822 grain size might be ignored by preliminary selection for domestication at ~10000 year  
823 ago, and some alleles that contribute to a wide adaptation of wheat to different  
824 environments (such as *Vrn3*) were left in wild einkorn wheat. In addition, a gene  
825 *Shattering (Sh1)* encoding a YABBY transcription factor, have been reported in rice,  
826 sorghum and maize for shattering phenotype, one of important domestication  
827 syndrome (Lin *et al.*, 2012). This gene was highly expressed in wild einkorn wheat  
828 with brittle rachis on field natural state, which implied that this gene might be one  
829 another genetic locus determining brittle rachis and/or was selected in domestication  
830 history of einkorn wheat, as *Q* and *Btr* loci in wheat and barley (Avni *et al.*, 2017;  
831 Dubcovsky and Dvorak, 2007; Pourkheirandish *et al.*, 2015). Thus, we speculate that  
832 there is a part of dominant genes or alleles to enlarge the grain size and further to  
833 increase the grain weight, could be characterized from natural wild einkorn wheat for  
834 the candidate potentials.

### 835 **Acknowledgements**

836 We thank Chikako Shindo and Tetsuo Sasakuma (Kihara Institute for Biological  
837 Research/Graduate School of Integrated Science, Yokohama City University, Japan) for  
838 providing experimental materials used in this study. This work was supported by National  
839 Key Research and Development Program of China (2016YFD0101802) and the National  
840 Natural Science Foundation of China (31571643).

### 841 **Author's contributions**

842 AZ, CL conceived and supervised the study; KY, DL, YC, DW, WLY, WY, LY, CZ, SZ and JS  
843 conducted the research and analyzed the data; KY and DL planed and conducted the  
844 construction of RAD-seq libraries; KY, DW, WLY, and JS collected phenotypic data; KY  
845 analyzed the genotypic and phenotypic data; KY collected samples for transcriptomic analysis;  
846 KY, YW, LY, CZ and SZ contributed to analyses of transcriptomic data; KY, DL, and AZ

847 prepared the manuscript. All authors discussed the results and commented on the manuscript.

#### 848 **Competing interests**

849 The authors declare that they have no competing interests.

#### **References**

**Avni R, Nave M, Barad O, et al.** 2017. Wild emmer genome architecture and diversity elucidate wheat evolution and domestication. *Science* **357**, 93-97.

**Baird NA, Etter PD, Atwood TS, Currey MC, Shiver AL, Lewis ZA, Selker EU, Cresko WA, Johnson EA.** 2008. Rapid SNP discovery and genetic mapping using sequenced RAD markers. *Plos One* **3**, e3376.

**Barchi L, Lanteri S, Portis E, et al.** 2012. A RAD tag derived marker based eggplant linkage map and the location of QTLs determining anthocyanin pigmentation. *Plos One* **7**, e43740.

**Bertioli DJ, Cannon SB, Froenicke L, et al.** 2016. The genome sequences of *Arachis duranensis* and *Arachis ipaensis*, the diploid ancestors of cultivated peanut. *Nature Genetics* **48**, 438-446.

**Brinton J, Simmonds J, Minter F, Leverington-Waite M, Snape J, Uauy C.** 2017. Increased pericarp cell length underlies a major quantitative trait locus for grain weight in hexaploid wheat. *New Phytologist* **215**, 1026-1038.

**Bullrich L, Appendino ML, Tranquilli G, Lewis S, Dubcovsky J.** 2002. Mapping of a thermo-sensitive earliness *per se* gene on *Triticum monococcum* chromosome 1A<sup>m</sup>. *Theor Appl Genet* **105**, 585-593.

**Campbell KG, Bergman CJ, Gualberto DG, Anderson JA, Giroux MJ, Hareland G, Fulcher RG, Sorrells ME, Finney PL.** 1999. Quantitative trait loci associated with kernel traits in a soft × hard wheat cross. *Crop Science* **39**, 1184-1195.

**Catchen JM, Amores A, Hohenlohe P, Cresko W, Postlethwait JH.** 2011. Stacks: building and genotyping Loci de novo from short-read sequences. *G3* **1**, 171-182.

**Chapman JA, Mascher M, Buluc A, et al.** 2015. A whole-genome shotgun approach for assembling and anchoring the hexaploid bread wheat genome. *Genome Biology* **16**, 26.

**Chen ZL, Wang BB, Dong XM, Liu H, Ren LH, Chen J, Hauck A, Song WB, Lai JS.** 2014. An ultra-high density bin-map for rapid QTL mapping for tassel and ear architecture in a large F<sub>2</sub> maize population. *Bmc Genomics* **15**, 433.

**Cheng R, Kong Z, Zhang L, Xie Q, Jia H, Yu D, Huang Y, Ma Z.** 2017. Mapping QTLs controlling kernel dimensions in a wheat inter-varietal RIL mapping population. *Theor Appl Genet* **130**, 1405-1414.

**Chutimanitsakun Y, Nipper RW, Cuesta-Marcos A, Cistue L, Corey A, Filichkina T, Johnson EA, Hayes PM.** 2011. Construction and application for QTL analysis of a Restriction Site Associated DNA (RAD) linkage map in barley. *Bmc Genomics* **12**, 4.

**Conesa A, Gotz S, Garcia-Gomez JM, Terol J, Talon M, Robles M.** 2005. Blast2GO: a universal tool for annotation, visualization and analysis in functional genomics research. *Bioinformatics* **21**, 3674-3676.



- Cui F, Zhang N, Fan XL, et al.** 2017. Utilization of a Wheat660K SNP array-derived high-density genetic map for high-resolution mapping of a major QTL for kernel number. *Sci Rep* **7**, 3788.
- Devos KM, Dubcovsky J, Dvorak J, Chinoy CN, Gale MD.** 1995. Structural evolution of wheat chromosomes 4A, 5A, and 7B and its impact on recombination. *Theor Appl Genet* **91**, 282-288.
- Dubcovsky J, Dvorak J.** 2007. Genome plasticity a key factor in the success of polyploid wheat under domestication. *Science* **316**, 1862-1866.
- Feuillet C, Travella S, Stein N, Albar L, Nublath A, Keller B.** 2003. Map-based isolation of the leaf rust disease resistance gene *Lr10* from the hexaploid wheat (*Triticum aestivum* L.) genome. *Proc Natl Acad Sci USA* **100**, 15253-15258.
- Gawronski P, Ariyadasa R, Himmelbach A, et al.** 2014. A distorted circadian clock causes early flowering and temperature-dependent variation in spike development in the *Eps-3A<sup>m</sup>* mutant of einkorn wheat. *Genetics* **196**, 1253-1261.
- Gegas VC, Nazari A, Griffiths S, Simmonds J, Fish L, Orford S, Sayers L, Doonan JH, Snape JW.** 2010. A genetic framework for grain size and shape variation in wheat. *Plant Cell* **22**, 1046-1056.
- Georgelis N, Braun EL, Shaw JR, Hannah LC.** 2007. The two AGPase subunits evolve at different rates in angiosperms, yet they are equally sensitive to activity-altering amino acid changes when expressed in bacteria. *Plant Cell* **19**, 1458-1472.
- Golan G, Oksenberg A, Peleg Z.** 2015. Genetic evidence for differential selection of grain and embryo weight during wheat evolution under domestication. *J Exp Bot* **66**, 5703-5711.
- Hori K, Takehara S, Nankaku N, Sato K, Sasakuma T, Takeda K.** 2007. Barley EST markers enhance map saturation and QTL mapping in diploid wheat. *Breeding Science* **57**, 39-45.
- Hou J, Li T, Wang Y, Hao C, Liu H, Zhang X.** 2017. ADP-glucose pyrophosphorylase genes, associated with kernel weight, underwent selection during wheat domestication and breeding. *Plant Biotechnology Journal* **15**, 1533-1543.
- Hu Y, Yan C, Hsu CH, Chen QR, Niu K, Komatsoulis GA, Meerzaman D.** 2014. OmicCircos: a simple-to-use R package for the circular visualization of multidimensional omics data. *Cancer Inform* **13**, 13-20.
- Iehisa JCM, Ohno R, Kimura T, Enoki H, Nishimura S, Okamoto Y, Nasuda S, Takumi S.** 2014. A high-density genetic map with array-based markers facilitates structural and quantitative trait locus analyses of the common wheat genome. *DNA Research* **21**, 555-567.
- International Wheat Genome Sequencing Consortium.** 2014. A chromosome-based draft sequence of the hexaploid bread wheat (*Triticum aestivum*) genome. *Science* **345**, 1251788.
- Jia J, Zhao S, Kong X, et al.** 2013. *Aegilops tauschii* draft genome sequence reveals a gene repertoire for wheat adaptation. *Nature* **496**, 91-95.
- Jiang QY, Hou J, Hao CY, Wang LF, Ge HM, Dong YS, Zhang XY.** 2011. The wheat (*T. aestivum*) sucrose synthase 2 gene (*TaSus2*) active in endosperm development is associated with yield traits. *Functional & Integrative Genomics* **11**, 49-61.
- Jing HC, Korniyukhin D, Kanyuka K, Orford S, Zlatska A, Mitrofanova OP, Koebner R, Hammond-Kosack K.** 2007. Identification of variation in adaptively important traits and genome-wide analysis of trait-marker associations in *Triticum monococcum*. *J Exp Bot* **58**,



3749-3764.

**King IP, Purdie KA, Liu CJ, Reader SM, Pittaway TS, Orford SE, Miller TE.** 1994. Detection of interchromosomal translocations within the Triticeae by RFLP analysis. *Genome* **37**, 882-887.

**Komatsuda T, Maxim P, Senthil N, Mano Y.** 2004. High-density AFLP map of nonbrittle rachis 1 (*btr1*) and 2 (*btr2*) genes in barley (*Hordeum vulgare* L.). *Theor Appl Genet* **109**, 986-995.

**Kosambi DD.** 1943. The estimation of map distances from recombination values. *Annals of Eugenics* **12**, 172-175.

**Krasileva KV, Vasquez-Gross HA, Howell T, et al.** 2017. Uncovering hidden variation in polyploid wheat. *Proc Natl Acad Sci USA* **114**, E913-E921.

**Kumar A, Mantovani EE, Seetan R, et al.** 2016. Dissection of genetic factors underlying wheat kernel shape and size in an elite x nonadapted cross using a high density SNP linkage map. *Plant Genome* **9**.

**Lewis S, Faricelli ME, Appendino ML, Valarik M, Dubcovsky J.** 2008. The chromosome region including the earliness per se locus *Eps-A<sup>m1</sup>* affects the duration of early developmental phases and spikelet number in diploid wheat. *J Exp Bot* **59**, 3595-3607.

**Li W, Yang B.** 2017. Translational genomics of grain size regulation in wheat. *Theor Appl Genet* **130**, 1765-1771.

**Lin Z, Li X, Shannon LM, et al.** 2012. Parallel domestication of the *Shattering1* genes in cereals. *Nature Genetics* **44**, 720-724.

**Ling HQ, Zhao S, Liu D, et al.** 2013. Draft genome of the wheat A-genome progenitor *Triticum urartu*. *Nature* **496**, 87-90.

**Maccaferri M, Ricci A, Salvi S, et al.** 2015. A high-density, SNP-based consensus map of tetraploid wheat as a bridge to integrate durum and bread wheat genomics and breeding. *Plant Biotechnology Journal* **13**, 648-663.

**Maphosa L, Langridge P, Taylor H, et al.** 2014. Genetic control of grain yield and grain physical characteristics in a bread wheat population grown under a range of environmental conditions. *Theor Appl Genet* **127**, 1607-1624.

**Mascher M, Gundlach H, Himmelbach A, et al.** 2017. A chromosome conformation capture ordered sequence of the barley genome. *Nature* **544**, 427-433.

**NBS.** 2015. National Bureau of Statistics of China. <http://data.stats.gov.cn/english/>. (Accessed 2 November, 2017).

**Peleg Z, Fahima T, Korol AB, Abbo S, Saranga Y.** 2011. Genetic analysis of wheat domestication and evolution under domestication. *J Exp Bot* **62**, 5051-5061.

**Pfender WF, Saha MC, Johnson EA, Slabaugh MB.** 2011. Mapping with RAD (restriction-site associated DNA) markers to rapidly identify QTL for stem rust resistance in *Lolium perenne*. *Theor Appl Genet* **122**, 1467-1480.

**Pourkheirandish M, Hensel G, Kilian B, et al.** 2015. Evolution of the grain dispersal system in barley. *Cell* **162**, 527-539.

**Prashant R, Kadoo N, Desale C, Kore P, Dhaliwal HS, Chhuneja P, Gupta V.** 2012. Kernel morphometric traits in hexaploid wheat (*Triticum aestivum* L.) are modulated by intricate QTL × QTL and genotype × environment interactions. *Journal of Cereal Science* **56**, 432-439.

- R Core Team.** 2016. R Core Team. R: A language and environment for statistical computing. R Foundation for Statistical Computing, Vienna, Austria. URL <https://www.R-project.org/>.
- Rasheed A, Xia XC, Ogonnaya F, Mahmood T, Zhang ZW, Mujeeb-Kazi A, He ZH.** 2014. Genome-wide association for grain morphology in synthetic hexaploid wheats using digital imaging analysis. *BMC Plant Biol* **14**, 128.
- Russo MA, Ficco DBM, Laido G, Marone D, Papa R, Blanco A, Gadaleta A, De Vita P, Mastrangelo AM.** 2014. A dense durum wheat  $\times$  *T. dicoccum* linkage map based on SNP markers for the study of seed morphology. *Molecular Breeding* **34**, 1579-1597.
- Saintenac C, Jiang DY, Wang SC, Akhunov E.** 2013. Sequence-based mapping of the polyploid wheat genome. *G3* **3**, 1105-1114.
- Segami S, Kono I, Ando T, Yano M, Kitano H, Miura K, Iwasaki Y.** 2012. *Small and round seed 5* gene encodes alpha-tubulin regulating seed cell elongation in rice. *Rice* **5**, 4.
- Shindo C, Sasakuma T, Watanabe N, Noda K.** 2002. Two-gene systems of vernalization requirement and narrow-sense earliness in einkorn wheat. *Genome* **45**, 563-569.
- Simons KJ, Fellers JP, Trick HN, Zhang ZC, Tai YS, Gill BS, Faris JD.** 2006. Molecular characterization of the major wheat domestication gene *Q*. *Genetics* **172**, 547-555.
- Singh K, Ghai M, Garg M, Chhuneja P, Kaur P, Schnurbusch T, Keller B, Dhaliwal HS.** 2007. An integrated molecular linkage map of diploid wheat based on a *Triticum boeoticum*  $\times$  *T. monococcum* RIL population. *Theor Appl Genet* **115**, 301-312.
- Slade AJ, Fuerstenberg SI, Loeffler D, Steine MN, Facciotti D.** 2005. A reverse genetic, nontransgenic approach to wheat crop improvement by TILLING. *Nature Biotechnology* **23**, 75-81.
- Snape J, Butterworth K, Whitechurch E, Worland AJ.** 2001. Waiting for fine times: Genetics of flowering time in wheat. *Wheat in a Global Environment* **9**, 67-74.
- Stein N, Feuillet C, Wicker T, Schlagenhauf E, Keller B.** 2000. Subgenome chromosome walking in wheat: a 450-kb physical contig in *Triticum monococcum* L. spans the *Lr10* resistance locus in hexaploid wheat (*Triticum aestivum* L.). *Proc Natl Acad Sci USA* **97**, 13436-13441.
- Sullivan TD, Strelow LI, Illingworth CA, Phillips RL, Nelson OE.** 1991. Analysis of maize *brittle-1* alleles and a defective Suppressor-mutator-induced mutable allele. *Plant Cell* **3**, 1337-1348.
- Tarazona S, Garcia-Alcalde F, Dopazo J, Ferrer A, Conesa A.** 2011. Differential expression in RNA-seq: a matter of depth. *Genome Research* **21**, 2213-2223.
- Trapnell C, Williams BA, Pertea G, Mortazavi A, Kwan G, van Baren MJ, Salzberg SL, Wold BJ, Pachter L.** 2010. Transcript assembly and quantification by RNA-Seq reveals unannotated transcripts and isoform switching during cell differentiation. *Nature Biotechnology* **28**, 511-515.
- Tsilo TJ, Hareland GA, Simsek S, Chao S, Anderson JA.** 2010. Genome mapping of kernel characteristics in hard red spring wheat breeding lines. *Theor Appl Genet* **121**, 717-730.
- Van Ooijen JW, Voorrips RE.** 2004. JoinMap Version 4.0, Software for the calculation of genetic linkage maps. Wageningen: Kyazma B.V.
- Voorrips RE.** 2002. MapChart: Software for the graphical presentation of linkage maps and QTLs. *Journal of Heredity* **93**, 77-78.
- Wang N, Fang L, Xin H, Wang L, Li S.** 2012a. Construction of a high-density genetic map

for grape using next generation restriction-site associated DNA sequencing. *BMC Plant Biol* **12**, 148.

**Wang RX, Hai L, Zhang XY, You GX, Yan CS, Xiao SH.** 2009. QTL mapping for grain filling rate and yield-related traits in RILs of the Chinese winter wheat population Heshangmai × Yu8679. *Theor Appl Genet* **118**, 313-325.

**Wang S, Basten CJ, Zeng Z-B.** 2012b. Wang, S., Basten, C. J. & Zeng, Z.-B. Windows QTL Cartographer 2.5. Department of Statistics, North Carolina State University, Raleigh, NC. URL <http://statgen.ncsu.edu/qtlcart/WQTLCart.htm>.

**Williams K, Sorrells ME.** 2014. Three-dimensional seed size and shape QTL in hexaploid wheat (*Triticum aestivum* L.) populations. *Crop Science* **54**, 98-110.

**Wu QH, Chen YX, Zhou SH, et al.** 2015. High-density genetic linkage map construction and QTL mapping of grain shape and size in the wheat population Yanda1817 × Beinong6. *Plos One* **10**, e0118144.

**Wu YH, Bhat PR, Close TJ, Lonardi S.** 2008. Efficient and accurate construction of genetic linkage maps from the minimum spanning tree of a graph. *Plos Genetics* **4**, e1000212.

**Xie WB, Feng Q, Yu HH, Huang XH, Zhao QA, Xing YZ, Yu SB, Han B, Zhang QF.** 2010. Parent-independent genotyping for constructing an ultrahigh-density linkage map based on population sequencing. *Proc Natl Acad Sci USA* **107**, 10578-10583.

**Yan L, Fu D, Li C, Blechl A, Tranquilli G, Bonafede M, Sanchez A, Valarik M, Yasuda S, Dubcovsky J.** 2006. The wheat and barley vernalization gene *VRN3* is an orthologue of *FT*. *Proc Natl Acad Sci USA* **103**, 19581-19586.

**Yan L, Loukoianov A, Tranquilli G, Helguera M, Fahima T, Dubcovsky J.** 2003. Positional cloning of the wheat vernalization gene *VRN1*. *Proc Natl Acad Sci USA* **100**, 6263-6268.

**Yan LL, Loukoianov A, Blechl A, Tranquilli G, Ramakrishna W, SanMiguel P, Bennetzen JL, Echenique V, Dubcovsky J.** 2004. The wheat *VRN2* gene is a flowering repressor down-regulated by vernalization. *Science* **303**, 1640-1644.

**Yang J, Zhang J, Wang Z, Xu G, Zhu Q.** 2004. Activities of key enzymes in sucrose-to-starch conversion in wheat grains subjected to water deficit during grain filling. *Plant Physiol* **135**, 1621-1629.

**Yu K, Liu DC, Wu WY, et al.** 2017. Development of an integrated linkage map of einkorn wheat and its application for QTL mapping and genome sequence anchoring. *Theor Appl Genet* **130**, 53-70.

**Zaharieva M, Monneveux P.** 2014. Cultivated einkorn wheat (*Triticum monococcum* L. subsp *monococcum*): the long life of a founder crop of agriculture. *Genetic Resources and Crop Evolution* **61**, 677-706.

**Zhang TZ, Hu Y, Jiang WK, et al.** 2015. Sequencing of allotetraploid cotton (*Gossypium hirsutum* L. acc. TM-1) provides a resource for fiber improvement. *Nature Biotechnology* **33**, 531-537.

**Zhang YX, Wang LH, Xin HG, Li DH, Ma CX, Ding X, Hong WG, Zhang XR.** 2013. Construction of a high-density genetic map for sesame based on large scale marker development by specific length amplified fragment (SLAF) sequencing. *BMC Plant Biol* **13**, 141.

**Zheng J, Liu H, Wang Y, Wang L, Chang X, Jing R, Hao C, Zhang X.** 2014. *TEF-7A*, a

transcript elongation factor gene, influences yield-related traits in bread wheat (*Triticum aestivum* L.). J Exp Bot **65**, 5351-5365.

**Table 1** Summary information of high-density of the high-density einkorn wheat genetic map.

| <b>Chr.</b> | <b>Length (cM)</b> | <b>SNP</b> | <b>Other markers</b> | <b>Total marker No.</b> | <b>Bin No.</b> | <b>Bin length (cM)</b> | <b>Marker interval (cM)</b> | <b>Max. gap (cM)</b> |
|-------------|--------------------|------------|----------------------|-------------------------|----------------|------------------------|-----------------------------|----------------------|
| Tm1A        | 245.33             | 1,233      | 110                  | 1,343                   | 206            | 1.19                   | 0.18                        | 4.85                 |
| Tm2A        | 265.16             | 1,621      | 111                  | 1,732                   | 230            | 1.15                   | 0.15                        | 6.71                 |
| Tm3A        | 293.50             | 1,466      | 190                  | 1,656                   | 242            | 1.21                   | 0.18                        | 6.28                 |
| Tm4A        | 264.33             | 1,453      | 103                  | 1,556                   | 176            | 1.50                   | 0.17                        | 20.82                |
| Tm5A        | 283.08             | 1,269      | 153                  | 1,422                   | 245            | 1.16                   | 0.20                        | 8.16                 |
| Tm6A        | 238.61             | 1,357      | 115                  | 1,472                   | 187            | 1.28                   | 0.16                        | 5.02                 |
| Tm7A        | 283.04             | 1,538      | 157                  | 1,695                   | 265            | 1.07                   | 0.17                        | 12.17                |
| Total       | 1,873.04           | 9,937      | 939                  | 10,876                  | 1,551          | 1.21                   | 0.17                        | 20.82                |

**Table 2** QTL detected with CIM method using the high-density einkorn wheat genetic map.

| Trait                                   | QTL                   | Env.                                         | Chr. | Location (cM) | LOD      | PVE (%)   | Direction | Additive    | QTL Region | LOD thresh. |
|-----------------------------------------|-----------------------|----------------------------------------------|------|---------------|----------|-----------|-----------|-------------|------------|-------------|
| Grain length (GL, mm)                   | <i>QGl.igdb-2A.1</i>  | E2, <u>E4</u> (GA, GC, TGW)                  | 2A   | 163.9-171.4   | 9.3      | 21.4      | -         | 0.25        | 2A-1       | 3.31        |
|                                         | <i>QGl.igdb-3A.1</i>  | E2, E3, E4, E5 (GW, GLW, GA, GC, TGW)        | 3A   | 273.6-283.3   | 3.5-14.2 | 7.3-35.4  | -         | 0.14-0.45   | 3A-2       |             |
|                                         | <i>QGl.igdb-5A.1</i>  | E3 (GW, GA, TGW)                             | 5A   | 142.8-148.5   | 3.5      | 8.1       | -         | 0.18        | 5A-2       |             |
|                                         | <i>QGl.igdb-6A.1</i>  | E4 (GW, GA, GC)                              | 6A   | 199.2-204.5   | 4.5      | 8.9       | -         | 0.21        | 6A-2       |             |
|                                         | <i>QGl.igdb-7A.1</i>  | E4, E5, <u>E3</u> (GC)                       | 7A   | 62.5-70.4     | 4.0-9.0  | 9.0-19.6  | +         | 0.16-0.34   | 7A-1       |             |
|                                         | <i>QGl.igdb-7A.2</i>  | E2, <u>E4</u> , <u>E3</u> , <u>E5</u> (GLW)  | 7A   | 209.1-213.6   | 6.9      | 15.5      | +         | 0.19        | 7A-2       |             |
| Grain width (GW, mm)                    | <i>QGw.igdb-1A.1</i>  | E2 (GLW, TGW)                                | 1A   | 214.0-218.1   | 6.4      | 12.9      | -         | 0.08        | 1A-3       | 3.39        |
|                                         | <i>QGw.igdb-2A.1</i>  | E2, <u>E5</u> (TGW)                          | 2A   | 204.4-206.3   | 6.4      | 12.7      | -         | 0.08        | 2A-2       |             |
|                                         | <i>QGw.igdb-3A.1</i>  | E3, <u>E4</u> (GL, GLW, GA, GC, TGW)         | 3A   | 278.5-281.1   | 8.8      | 24.1      | -         | 0.13        | 3A-2       |             |
|                                         | <i>QGw.igdb-5A.1</i>  | E4, <u>E3</u> ; Specific                     | 5A   | 102.5-106.0   | 6.1      | 16.2      | -         | 0.10        | 5A-1       |             |
|                                         | <i>QGw.igdb-5A.2</i>  | E2 (GL, GA, TGW)                             | 5A   | 148.5-150.3   | 3.9      | 7.2       | -         | 0.07        | 5A-2       |             |
|                                         | <i>QGw.igdb-5A.3</i>  | E2 (GA, TGW)                                 | 5A   | 184.8-190.9   | 4.7      | 8.9       | -         | 0.07        | 5A-3       |             |
|                                         | <i>QGw.igdb-6A.1</i>  | E4, <u>E2</u> (GL, GA, GC)                   | 6A   | 204.4-211.3   | 3.4      | 9.0       | -         | 0.07        | 6A-2       |             |
|                                         | <i>QGw.igdb-7A.1</i>  | E4 (GA, TGW)                                 | 7A   | 242.2-250.2   | 3.5      | 8.8       | +         | 0.07        | 7A-3       |             |
| Grain length/width (GLW)                | <i>QGlw.igdb-1A.1</i> | E3, E4 (Specific)                            | 1A   | 69.8-81.8     | 4.1-4.2  | 9.4-9.8   | -         | 0.089-0.092 | 1A-1       | 3.36        |
|                                         | <i>QGlw.igdb-1A.2</i> | E2, E4, <u>E3</u> (GW, TGW)                  | 1A   | 200.8-224.3   | 5.0-5.3  | 9.6-12.2  | +         | 0.09-0.10   | 1A-3       |             |
|                                         | <i>QGlw.igdb-3A.1</i> | E5 (GL, GW, GA, GC, TGW)                     | 3A   | 274.4-281.4   | 4.1      | 8.0       | -         | 0.10        | 3A-2       |             |
|                                         | <i>QGlw.igdb-6A.1</i> | E2, E5 (Specific)                            | 6A   | 169.2-173.3   | 9.6-13.5 | 19.0-34.0 | +         | 0.13-0.21   | 6A-1       |             |
|                                         | <i>QGlw.igdb-7A.1</i> | E2, E3, E5 (GL)                              | 7A   | 207.5-215.4   | 5.6-7.3  | 10.9-15.6 | +         | 0.10-0.13   | 7A-2       |             |
| Grain area (GA, mm <sup>2</sup> )       | <i>QGa.igdb-1A.1</i>  | E4 (TGW)                                     | 1A   | 139.9-145.1   | 6.9      | 17.5      | +         | 0.92        | 1A-2       | 3.36        |
|                                         | <i>QGa.igdb-2A.1</i>  | E2, E3 (GL, GC, TGW)                         | 2A   | 186.5-191.3   | 3.4-7.8  | 7.7-17.2  | -         | 0.60-0.73   | 2A-1       |             |
|                                         | <i>QGa.igdb-3A.1</i>  | E4 (TGW)                                     | 3A   | 11.0-18.3     | 4.8      | 11.2      | -         | 0.73        | 3A-1       |             |
|                                         | <i>QGa.igdb-3A.2</i>  | E2, E3, E4, <u>E5</u> (GL, GW, GLW, GC, TGW) | 3A   | 275.5-280.1   | 3.4-10.4 | 6.9-27.6  | -         | 0.46-1.16   | 3A-2       |             |
|                                         | <i>QGa.igdb-5A.1</i>  | E2, <u>E3</u> (GL, GW, TGW)                  | 5A   | 162.1-164.3   | 9.6      | 22.3      | -         | 0.81        | 5A-2       |             |
|                                         | <i>QGa.igdb-5A.2</i>  | E4, <u>E5</u> (GW, TGW)                      | 5A   | 181.0-186.7   | 4.1      | 9.3       | -         | 0.65        | 5A-3       |             |
|                                         | <i>QGa.igdb-6A.1</i>  | E2 (GL, GW, GC)                              | 6A   | 205.3-214.7   | 4.1      | 8.8       | -         | 0.50        | 6A-2       |             |
|                                         | <i>QGa.igdb-7A.1</i>  | E4 (GW, TGW)                                 | 7A   | 243.5-249.1   | 3.4      | 6.4       | +         | 0.55        | 7A-3       |             |
| Grain circumference (GC, mm)            | <i>QGc.igdb-2A.1</i>  | E2, <u>E4</u> (GL, GA, TGW)                  | 2A   | 162.2-173.2   | 6.7      | 16.4      | -         | 0.48        | 2A-1       | 3.30        |
|                                         | <i>QGc.igdb-3A.1</i>  | E2, E3, E4, E5 (GL, GW, GLW, GA, TGW)        | 3A   | 275.3-282.9   | 5.6-13.8 | 12.5-34.4 | -         | 0.40-0.98   | 3A-2       |             |
|                                         | <i>QGc.igdb-5A.1</i>  | E2, <u>E3</u> (Specific)                     | 5A   | 268.8-275.1   | 6.9      | 20.8      | -         | 0.51        | 5A-5       |             |
|                                         | <i>QGc.igdb-6A.1</i>  | E4 (GL, GW, GA)                              | 6A   | 199.4-204.5   | 4.8      | 9.6       | -         | 0.48        | 6A-2       |             |
|                                         | <i>QGc.igdb-7A.1</i>  | E2, E3, E4, <u>E5</u> (GL)                   | 7A   | 62.3-69.9     | 4.0-8.9  | 8.9-19.6  | +         | 0.37-0.75   | 7A-1       |             |
| Thousand-grain weight (g / 1000 grains) | <i>QTgw.igdb-1A.1</i> | E4, <u>E2</u> (GA)                           | 1A   | 140.9-145.1   | 7.0      | 18.3      | +         | 2.18        | 1A-2       | 3.32        |
|                                         | <i>QTgw.igdb-1A.2</i> | E1, <u>E4</u> (GW, GLW)                      | 1A   | 201.8-207.6   | 4.7      | 9.0       | -         | 1.20        | 1A-3       |             |
|                                         | <i>QTgw.igdb-2A.1</i> | E2, E3, E5 (GL, GA, GC)                      | 2A   | 169.1-190.1   | 5.7-7.3  | 11.5-16.9 | -         | 1.47-2.00   | 2A-1       |             |

|                       |                                                         |    |             |          |           |   |           |      |
|-----------------------|---------------------------------------------------------|----|-------------|----------|-----------|---|-----------|------|
| <i>QTgw.igdb-2A.2</i> | E1 (GW)                                                 | 2A | 202.1-204.4 | 7.7      | 15.9      | - | 1.59      | 2A-2 |
| <i>QTgw.igdb-3A.1</i> | E1, E4, <u>E2</u> (GA)                                  | 3A | 8.5-18.1    | 3.6-4.2  | 6.7-10.3  | - | 1.04-1.65 | 3A-1 |
| <i>QTgw.igdb-3A.2</i> | E2, E3, E4, <u>E1</u> , <u>E5</u> (GL, GW, GLW, GA, GC) | 3A | 275.0-282.9 | 8.0-14.2 | 15.5-38.1 | - | 1.74-3.03 | 3A-2 |
| <i>QTgw.igdb-5A.1</i> | E2 (GL, GW, GA)                                         | 5A | 145.6-148.0 | 8.2      | 16.8      | - | 1.82      | 5A-2 |
| <i>QTgw.igdb-5A.2</i> | E1, E4 (GW, GA)                                         | 5A | 180.8-189.7 | 3.5-12.7 | 8.0-28.8  | - | 1.38-2.15 | 5A-3 |
| <i>QTgw.igdb-5A.3</i> | E2 (Specific)                                           | 5A | 251.4-256.4 | 5.7      | 10.8      | - | 1.41      | 5A-4 |
| <i>QTgw.igdb-7A.1</i> | E4 (GW, GA)                                             | 7A | 242.7-251.8 | 3.5      | 6.7       | + | 1.29      | 7A-3 |

Note: The phenotypic data were collected from five environments, E1, E2, E3, E4, and E5, which represent Beijing 2011, Beijing 2012, Beijing 2013, Beijing 2014, and Zhengzhou 2014, respectively. Underline labeled environments denote that QTL in these environments were detected above 2.0 LOD but below threshold LOD scores (~3.3). The QTL detected in single environment were also reported because of them overlapping with QTL for other traits or linking with homologous genes at these regions. The overlapped QTL related traits and some genomic regions-specific QTL were present in brackets. The mapped location were defined as 95% CI from identified environments. Chromosomes Tm1A to Tm7A are abbreviated to 1A to 7A in this table. PVE, proportion variations explained by QTL. Direction, additive effect estimated of KT1-1 allele: “+” for positive effect, “-” for negative effect. Additive, the KT1-1 allele effect. QTL regions are defined by the ranges of all CIs from all traits. LOD thresholds were calculated from 1,000-time permutations for each trait-environment combinations. The thresholds reported here were an average of all environments for each trait.

## Figure legends

**Fig. 1** Phenotypic performances and distribution and correlation coefficients for six quantitative traits of parents and RILs using the average phenotypic data. The frequency distribution of phenotypic data of each trait was shown in the histogram at the diagonal cells. The X-Y scatter plot showed the correlation between traits at the lower-triangle panel, while the corresponding Pearson's coefficients and  $P$  values of multiple comparison significant test were put on the upper-triangle panel. \*,  $P < 0.05$ ; \*\*,  $P < 0.01$ . GL, grain length; GW, grain width; GLW, grain length / width; GA, grain area; GC, grain circumference; TGW, thousand-grain weight.

**Fig. 2** QTL detected in genome-wide using high-density genetic map of einkorn wheat. Genetic map showed 17 genomic regions harboring quantitative trait loci (QTL) for six grain traits in an einkorn wheat RIL population of *T. monococcum* ssp. *boeoticum* (KT1-1) and *T. monococcum* ssp. *monococcum* (KT3-5). The detected QTL for each trait from each environment were combined with confidential intervals and mapped on the genetic map. At each linkage group, each QTL was plotted at right side, while the candidate genes in each QTL region were put at left side. Detailed information of QTL is available in **Error! Reference source not found.** The candidate genes of each QTL region were shown in blue shaded, the red arrows showing the QTL regions. Genes in red were mapped through developing functional markers and genetic mapping, while black bold denoted genes located inside QTL region, red or black normal for genes surrounding QTL region. The yellow shaded portions of each linkage group are the probable centromere regions. The positions of SNP and other type of markers were denoted with black and red ticks, respectively. GL, grain length, GW, grain width, GLW, grain length / width, GA, grain area, GC, grain circumference, TGW, thousand-grain weight.

**Fig. 3** Genomic collinearity and chromosomal structure variations revealed by using the high-density genetic map of einkorn wheat. (a) SNP markers were aligned against the four einkorn wheat related genomes (A, B, D from hexaploid wheat, and H genome from barley), and the positions of the hit markers were compared with physical locations from four



genomes. (b) Comparisons of the marker positions on homologous groups 4, 5, and 7, elucidate 4AL/5AL/7BS translocations using einkorn wheat genetic map. The detail information were given in (c).

**Fig. 4** Transcriptional profiles of genes mapped to QTL regions in two parental lines. Only genes differentiated expressed in at least one developmental stage (probability > 0.7) were retained, while genes with names in red were probability > 0.8 from NOISeq. The  $\log_{10}(\text{FPKM}+1)$  transformed data were plotted.

**Fig. 5** Fold changes and expression patterns of starch biosynthesis genes across four grain developmental stages between two parental lines. Only genes differentiated expressed in at least one developmental stage (probability > 0.7) were retained, while genes with names in red were probability > 0.8 from NOISeq. (a) Wheat starch biosynthesis pathway. The  $\text{Log}_2$  fold change of KT1-1 vs KT3-5 in FPKM at four developmental stages were plotted in heatmap. (b) Heatmap of the expression profiles of the starch biosynthesis pathway genes in grains of two parental lines, KT1-1 (left) and KT3-5 (right). The  $\log_{10}(\text{FPKM}+1)$  transformed data were plotted in (b).

### Table legends

**Table 1** Summary information of high-density of the high-density einkorn wheat genetic map.

**Table 2** QTL detected with CIM method using the high-density einkorn wheat genetic map.

### Supplementary data

**Fig. S1** Frequency distribution of phenotypic data in five environments for six quantitative traits of parents and RILs.

**Fig. S2** Principal component analysis revealing a morphometric model for variation in grain morphology in einkorn wheat RIL population.

**Fig. S3** Chromosomal 4AL/5AL translocation and 4A pericentric inversion in hexaploid wheat revealed by comparing barley and hexaploid wheat genomes through the mapped SNP markers from einkorn wheat. (a) The einkorn wheat genetic map was compared with barley

genome. (b) Physical positions of SNP markers on barley genome (X-axis) was compared with positions on Chinese Spring A genome physical map (Y-axis), which elucidated 4AL/5AL translocation event in A genome of hexaploid wheat and einkorn wheat, and pericentric inversion on 4A in hexaploid wheat. (c) Genomic coverages of the physical maps of hexaploid wheat and barley spanned by the einkorn wheat genetic map.

**Fig. S4** Genome-wide LOD profiles for six investigated traits across five environments. (a) LOD profile; (b) phenotypic variation explained by QTL; (c) additive effects by KT1-1 allele.

**Fig. S5** Physical lengths of homologous regions corresponding to sixteen QTL regions.

**Fig. S6** Polymorphism of *Vrn3* in einkorn wheat. A 6-bp InDel was detected at -195 upstream of the promoter region of *Vrn3*, and molecular marker (Vrn3-InDel-F1: TGAAGTGGTCTGGACATGGA in red and Vrn3-InDel-R1: GGAGCAAGCAGCAGAGGTTA in green) was developed around this variation, producing 162 bp at KT1-1 and 168 bp at KT3-5.

**Fig. S7** Genetic overlaps between grain size related traits in the einkorn wheat RIL population. Distribution of 42 unique QTL at seventeen QTL regions for six investigated traits across five environments.

**Fig. S8** Phenotypic variations affected by positive number of allele for six quantitative traits using the average phenotypic data. (a) Mean phenotypic values for each trait. (b) Phenotypic values of six trait from each environment.

**Fig. S9** Polymorphism of *AGPL* in einkorn wheat. An InDel were detected at Intron I of *AGPL*, and molecular marker (AGPL-F1: CTCCAGGAGGATGTGCAAC in green and AGPL-R1: CAGAGATGCTAACATAACAGAGTG in red) was developed around this variation, producing 156 bp at KT1-1 and 165 bp at KT3-5. Positions of exon and intron were denoted with brown boxes.

**Fig. S10** GO and KEGG enrichment analysis of differential expressed (DE) genes identified from four developmental stages of KT1-1 vs KT3-5. Numbers in red and black denoted up- and down-regulated genes, respectively. (a) Overlaps of DE genes from four developmental stages. (b) GO enrichment analysis of DE genes, \*  $P < 0.05$ , \*\*  $P < 0.01$ . (c) KEGG enrichment analysis of DE genes, \*  $P < 0.05$  (left) or  $Q < 0.05$  (right), and pathway names in

red and green denote the  $Q < 0.05$  and  $> 0.05$ , respectively.

**Table S1** Summary statistics and broad-sense heritability of six grain size related traits.

**Table S2** Correlation coefficients between GL, GW, GLW, GA, GC, and TGW in the RIL population in six environments.

**Table S3** Principal components analysis and correlation with phenotypic data. Probability loadings of principal components identified in four environments (a) and Pearson's correlation coefficients of two principal components with phenotypic data in each environment (b).

**Table S4** Barcode and sequencing information of RAD-seq.

**Table S5** The high-density genetic linkage map of einkorn wheat.

**Table S6** Individual QTL detected with CIM method from five environments using the high-density SNP map of einkorn wheat.

**Table S7** Candidate genes mapped to QTL region based on homologous analysis with hexaploid wheat, barley and rice.

**Table S8** Polymorphic markers of functional genes.

**Table S9** Phenotypic variation explained by the detected QTL estimated using analysis of variance (ANOVA) results from a simple model and multiple regression analysis. Each of the detected QTL are represented by their peak markers.

**Table S10** Multiple comparison test of phenotypic variations affected by positive number of allele for six quantitative traits across all five environments. One-way ANOVA followed by Tukey's Honestly Significant Difference (HSD) test was performed, and different letters were assigned to significantly different groups ( $P < 0.05$ ). NA for not available.

**Table S11** GO enrichment test of DE genes identified in einkorn wheat grains from four developmental stages.

**Table S12** KEGG enrichment test of DE genes identified in einkorn wheat grains from four developmental stages.

**Table S13** Expression profiles of genes involving in starch biosynthesis pathway and candidate genes mapped to QTL region based on homologous analysis with hexaploid wheat, barley and rice.

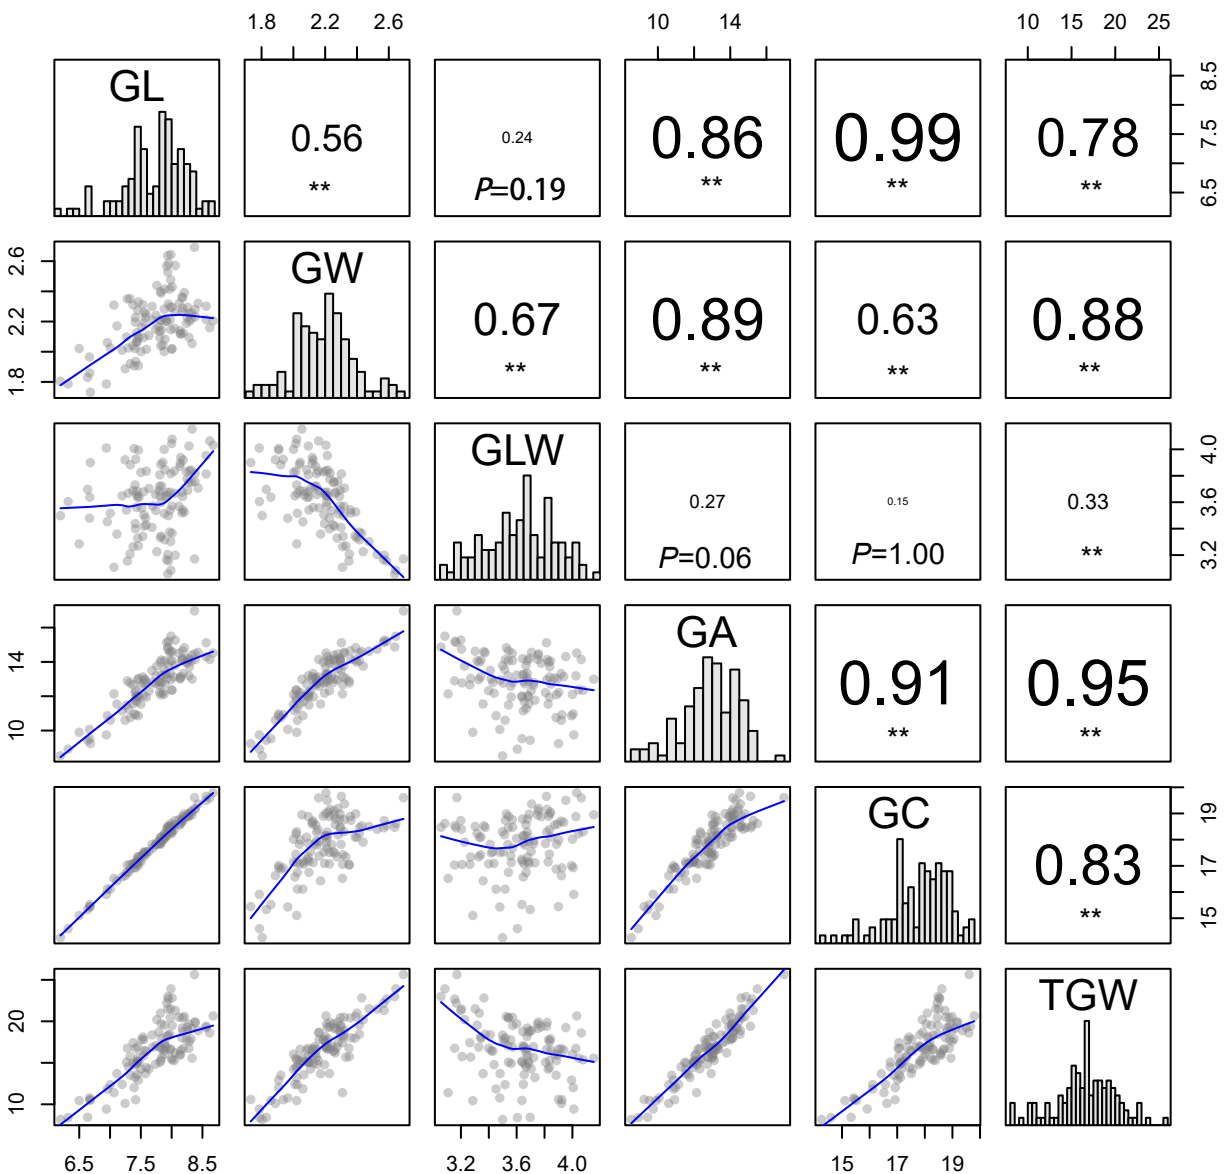



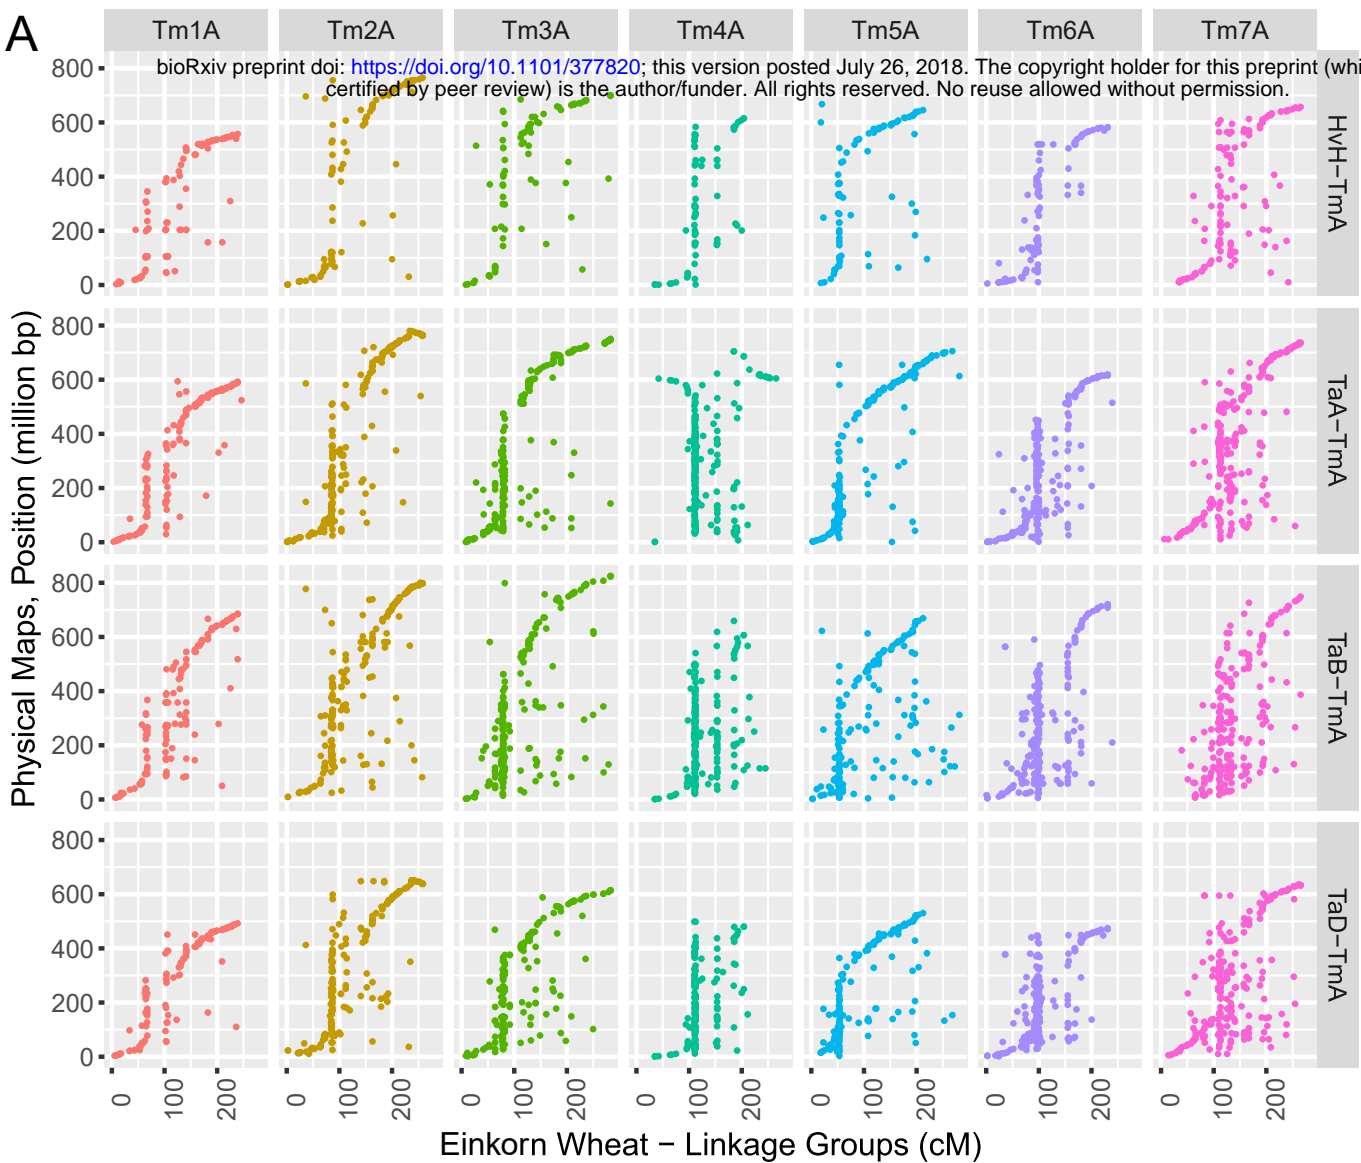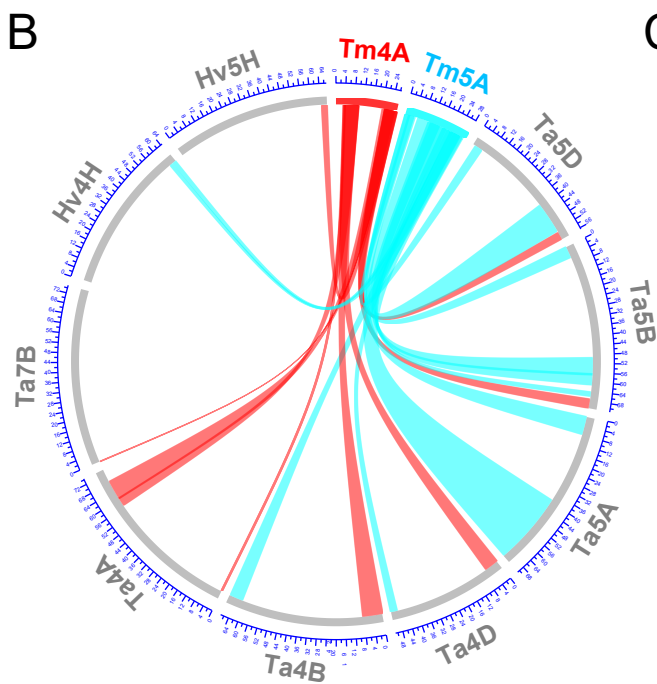

**C**

| Genetic region on einkorn wheat linkage map |            |          | Homologous blocks on hexaploid wheat and barley genomes |             |           | Evolution events |
|---------------------------------------------|------------|----------|---------------------------------------------------------|-------------|-----------|------------------|
| Chr.                                        | Start (cM) | End (cM) | Chr.                                                    | Start (Mbp) | End (Mbp) |                  |
| Tm4A                                        | 33.88      | 38.17    | 4A                                                      | 0.193       | 0.516     |                  |
|                                             | 33.88      | 96.80    | 4D                                                      | 0.464       | 56.725    |                  |
|                                             | 38.17      | 96.80    | 4B                                                      | 0.202       | 83.305    |                  |
|                                             | 41.20      | 95.38    | 4A                                                      | 603.374     | 570.263   |                  |
|                                             | 202.97     | 252.81   | 4A                                                      | 685.749     | 605.027   |                  |
|                                             | 213.64     | 264.33   | 5B                                                      | 675.87      | 710.624   | 4A/L/5A/L        |
|                                             | 213.64     | 262.87   | 5D                                                      | 534.871     | 562.625   | 4A/L/5A/L        |
|                                             | 213.64     | 264.33   | 5H                                                      | 648.521     | 668.689   | 4A/L/5A/L        |
| 261.92                                      | 262.87     | 7B       | 0.141                                                   | 1.381       | 4A/L/7B/S |                  |
| Tm5A                                        | 1.39       | 42.08    | 5A                                                      | 2.311       | 76.326    |                  |
|                                             | 1.39       | 17.23    | 5B                                                      | 1.741       | 47.059    |                  |
|                                             | 17.23      | 35.96    | 5D                                                      | 14.118      | 43.912    |                  |
|                                             | 59.23      | 266.97   | 5A                                                      | 393.76      | 704.834   |                  |
|                                             | 106.95     | 202.81   | 5D                                                      | 393.179     | 523.377   |                  |
|                                             | 117.73     | 153.61   | 5B                                                      | 496.579     | 566.973   |                  |
|                                             | 175.30     | 184.83   | 5B                                                      | 566.185     | 609.935   |                  |
|                                             | 196.03     | 202.81   | 5B                                                      | 644.576     | 658.916   |                  |
|                                             | 211.36     | 217.41   | 4H                                                      | 624.63      | 618.677   | 4A/L/5A/L        |
|                                             | 212.78     | 262.76   | 4B                                                      | 615.773     | 668.365   | 4A/L/5A/L        |
|                                             | 212.78     | 250.35   | 4D                                                      | 484.269     | 509.434   | 4A/L/5A/L        |
|                                             | 228.34     | 253.13   | 4H                                                      | 634.479     | 644.855   | 4A/L/5A/L        |

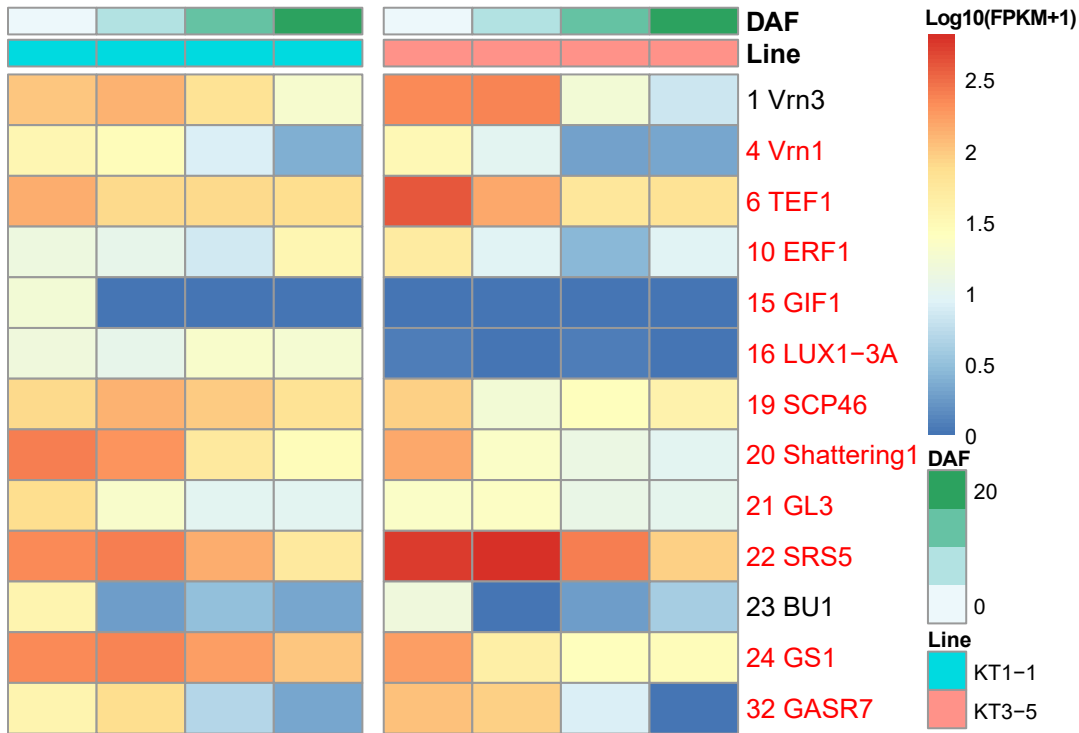



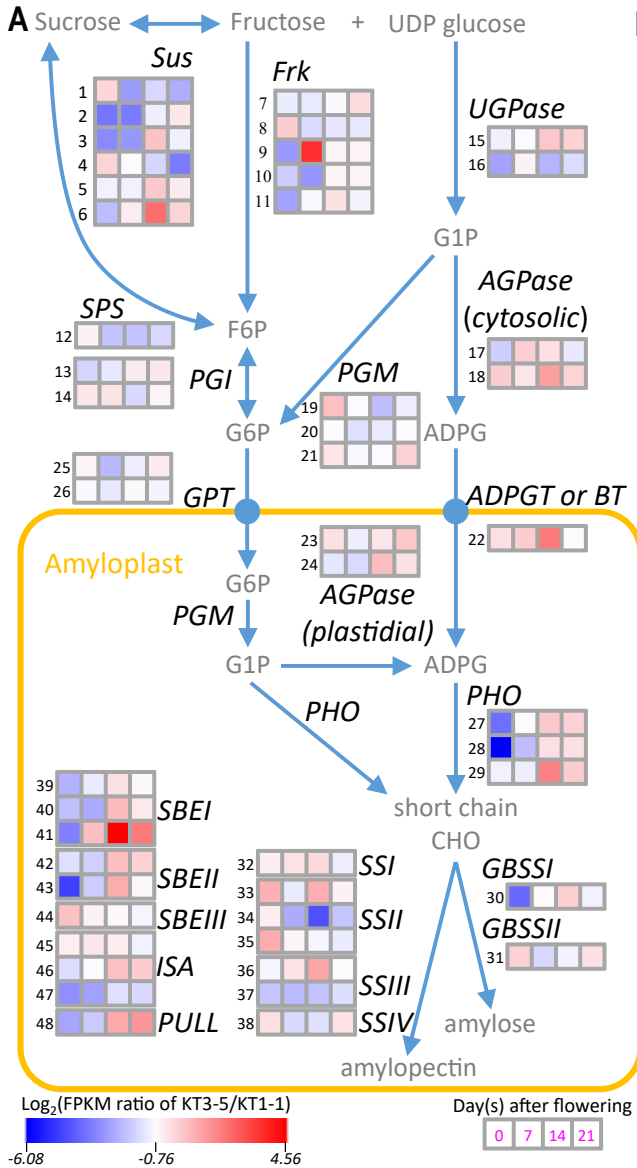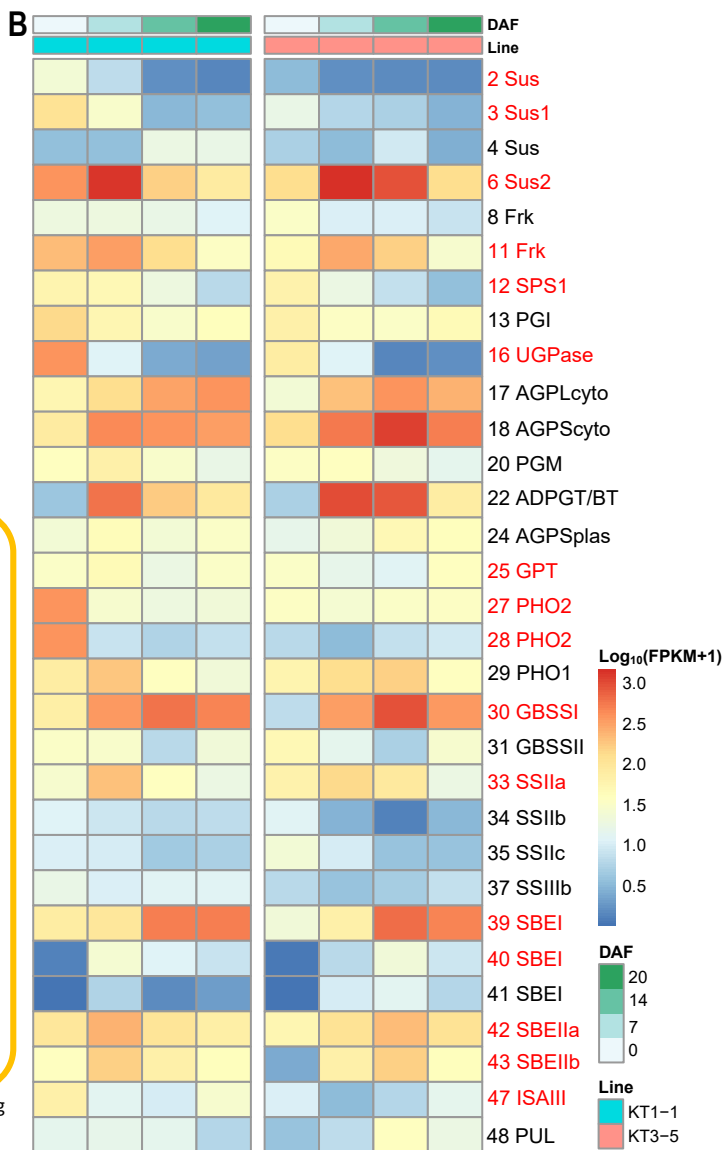

Source: http://biorxiv.org/content/10.1101/377820v1.full.pdf
